# Supplementary material for: Analysis of Important Gene Ontology Terms and Biological Pathways Related to Pancreatic Cancer
Source: Biomed Res Int. 2016 Nov 9;2016:7861274. doi: 10.1155/2016/7861274 (PMC5120232; doi:10.1155/2016/7861274)
Supplement: Supplementary file 1 — Supplementary Material I lists 65 validated genes related to pancreatic cancer. Supplementary Material II lists the MaxRel feature list obtained by mRMR method. [file 7861274.f1.zip]

Archive with 2 entries (2 files):
- Supp_I.docx
- Supp_II.xlsx
