# Supplementary material for: Analysis of Important Gene Ontology Terms and Biological Pathways Related to Pancreatic Cancer
Source: Biomed Res Int. 2016 Nov 9;2016:7861274. doi: 10.1155/2016/7861274 (PMC5120232; doi:10.1155/2016/7861274)
Supplement: Supplementary file 1 — Supplementary Material I lists 65 validated genes related to pancreatic cancer. Supplementary Material II lists the MaxRel feature list obtained by mRMR method. [file 7861274.f1.zip › Supp_II.xlsx]

## Sheet: Sheet1
Supplementary Material II. The MaxRel feature list obtained by mRMR method
Order	Feature name	GO term/Pathway name	Score
1	hsa05211	Renal cell carcinoma	0.011
2	GO:0007265	Ras protein signal transduction	0.011
3	hsa04010	MAPK signaling pathway	0.011
4	hsa05212	Pancreatic cancer	0.011
5	hsa05200	Pathways in cancer	0.011
6	hsa05210	Colorectal cancer	0.011
7	hsa05214	Glioma	0.011
8	hsa05220	Chronic myeloid leukemia	0.011
9	hsa05223	Non-small cell lung cancer	0.01
10	hsa04510	Focal adhesion	0.01
11	hsa05213	Endometrial cancer	0.01
12	hsa05221	Acute myeloid leukemia	0.01
13	hsa05215	Prostate cancer	0.01
14	hsa05160	Hepatitis C	0.01
15	GO:0048011	neurotrophin TRK receptor signaling pathway	0.01
16	hsa04012	ErbB signaling pathway	0.01
17	GO:0016772	transferase activity, transferring phosphorus-containing groups	0.01
18	hsa04660	T cell receptor signaling pathway	0.01
19	GO:0016303	1-phosphatidylinositol-3-kinase activity	0.01
20	hsa04150	mTOR signaling pathway	0.01
21	GO:0004713	protein tyrosine kinase activity	0.01
22	hsa04722	Neurotrophin signaling pathway	0.01
23	hsa04370	VEGF signaling pathway	0.009
24	GO:0008286	insulin receptor signaling pathway	0.009
25	hsa04664	Fc epsilon RI signaling pathway	0.009
26	GO:0004672	protein kinase activity	0.009
27	hsa04914	Progesterone-mediated oocyte maturation	0.009
28	GO:0036092	phosphatidylinositol-3-phosphate biosynthetic process	0.009
29	GO:0019901	protein kinase binding	0.009
30	hsa05219	Bladder cancer	0.009
31	GO:0007173	epidermal growth factor receptor signaling pathway	0.009
32	GO:0035004	phosphatidylinositol 3-kinase activity	0.009
33	GO:0000186	activation of MAPKK activity	0.009
34	GO:0006915	apoptotic process	0.009
35	hsa04662	B cell receptor signaling pathway	0.009
36	GO:0006468	protein phosphorylation	0.009
37	hsa04910	Insulin signaling pathway	0.009
38	GO:0007165	signal transduction	0.009
39	hsa05222	Small cell lung cancer	0.009
40	hsa04520	Adherens junction	0.009
41	GO:0035747	natural killer cell chemotaxis	0.009
42	GO:0072672	neutrophil extravasation	0.009
43	GO:0046934	phosphatidylinositol-4,5-bisphosphate 3-kinase activity	0.009
44	GO:0030335	positive regulation of cell migration	0.009
45	hsa04810	Regulation of actin cytoskeleton	0.009
46	hsa05218	Melanoma	0.009
47	GO:0018105	peptidyl-serine phosphorylation	0.009
48	GO:0005942	phosphatidylinositol 3-kinase complex	0.009
49	hsa05166	HTLV-I infection	0.009
50	GO:0008624	apoptotic signaling pathway	0.009
51	GO:0008543	fibroblast growth factor receptor signaling pathway	0.009
52	hsa05100	Bacterial invasion of epithelial cells	0.009
53	GO:0000165	MAPK cascade	0.009
54	GO:0010818	T cell chemotaxis	0.009
55	GO:0090398	cellular senescence	0.009
56	GO:0000187	activation of MAPK activity	0.009
57	hsa05145	Toxoplasmosis	0.009
58	GO:0030168	platelet activation	0.009
59	hsa04912	GnRH signaling pathway	0.009
60	GO:0034111	negative regulation of homotypic cell-cell adhesion	0.009
61	GO:2000379	positive regulation of reactive oxygen species metabolic process	0.008
62	GO:0010629	negative regulation of gene expression	0.008
63	hsa04620	Toll-like receptor signaling pathway	0.008
64	GO:0035666	TRIF-dependent toll-like receptor signaling pathway	0.008
65	hsa04380	Osteoclast differentiation	0.008
66	GO:0032570	response to progesterone	0.008
67	GO:2000369	regulation of clathrin-mediated endocytosis	0.008
68	hsa05142	Chagas disease (American trypanosomiasis)	0.008
69	GO:0005816	spindle pole body	0.008
70	GO:0048313	Golgi inheritance	0.008
71	GO:0004728	receptor signaling protein tyrosine phosphatase activity	0.008
72	hsa04210	Apoptosis	0.008
73	GO:0007050	cell cycle arrest	0.008
74	GO:0045768	obsolete positive regulation of anti-apoptosis	0.008
75	GO:0043524	negative regulation of neuron apoptotic process	0.008
76	hsa04630	Jak-STAT signaling pathway	0.008
77	GO:0001934	positive regulation of protein phosphorylation	0.008
78	GO:0044029	hypomethylation of CpG island	0.008
79	GO:2000653	regulation of genetic imprinting	0.008
80	GO:0019002	GMP binding	0.008
81	GO:0008285	negative regulation of cell proliferation	0.008
82	GO:0032869	cellular response to insulin stimulus	0.008
83	GO:0035754	B cell chemotaxis	0.008
84	hsa05164	Influenza A	0.008
85	GO:0050852	T cell receptor signaling pathway	0.008
86	GO:0007596	blood coagulation	0.008
87	GO:0008284	positive regulation of cell proliferation	0.008
88	GO:0034130	toll-like receptor 1 signaling pathway	0.008
89	GO:0001544	initiation of primordial ovarian follicle growth	0.008
90	GO:0005901	caveola	0.008
91	GO:0046854	phosphatidylinositol phosphorylation	0.008
92	GO:0043066	negative regulation of apoptotic process	0.008
93	GO:0016773	phosphotransferase activity, alcohol group as acceptor	0.008
94	GO:0014065	phosphatidylinositol 3-kinase signaling	0.008
95	GO:0051897	positive regulation of protein kinase B signaling	0.008
96	GO:0033574	response to testosterone	0.008
97	GO:0045727	positive regulation of translation	0.008
98	hsa05131	Shigellosis	0.008
99	hsa05162	Measles	0.008
100	hsa05216	Thyroid cancer	0.008
101	GO:0048146	positive regulation of fibroblast proliferation	0.008
102	GO:0035005	1-phosphatidylinositol-4-phosphate 3-kinase activity	0.008
103	GO:0060749	mammary gland alveolus development	0.008
104	GO:0042177	negative regulation of protein catabolic process	0.008
105	GO:0005829	cytosol	0.008
106	GO:0051403	stress-activated MAPK cascade	0.008
107	GO:0004674	protein serine/threonine kinase activity	0.008
108	hsa04320	Dorso-ventral axis formation	0.008
109	GO:0002756	MyD88-independent toll-like receptor signaling pathway	0.008
110	hsa05120	Epithelial cell signaling in Helicobacter pylori infection	0.008
111	GO:0002755	MyD88-dependent toll-like receptor signaling pathway	0.008
112	GO:0048015	phosphatidylinositol-mediated signaling	0.008
113	GO:0034134	toll-like receptor 2 signaling pathway	0.008
114	GO:0007507	heart development	0.008
115	GO:0008633	obsolete activation of pro-apoptotic gene products	0.008
116	GO:0070527	platelet aggregation	0.008
117	GO:0030971	receptor tyrosine kinase binding	0.008
118	GO:0043065	positive regulation of apoptotic process	0.008
119	GO:0034097	response to cytokine	0.008
120	GO:0016310	phosphorylation	0.008
121	GO:0048754	branching morphogenesis of an epithelial tube	0.008
122	hsa04670	Leukocyte transendothelial migration	0.008
123	GO:0014829	vascular smooth muscle contraction	0.008
124	GO:0019903	protein phosphatase binding	0.008
125	GO:0034142	toll-like receptor 4 signaling pathway	0.008
126	GO:0043560	insulin receptor substrate binding	0.008
127	GO:0008063	Toll signaling pathway	0.008
128	GO:0002053	positive regulation of mesenchymal cell proliferation	0.008
129	GO:0006917	apoptotic process	0.008
130	GO:0002224	toll-like receptor signaling pathway	0.008
131	GO:0019899	enzyme binding	0.008
132	GO:0034138	toll-like receptor 3 signaling pathway	0.008
133	GO:0042802	identical protein binding	0.007
134	GO:0016477	cell migration	0.007
135	GO:0043406	positive regulation of MAP kinase activity	0.007
136	GO:0046777	protein autophosphorylation	0.007
137	GO:0051146	striated muscle cell differentiation	0.007
138	hsa04062	Chemokine signaling pathway	0.007
139	hsa04144	Endocytosis	0.007
140	GO:0004708	MAP kinase kinase activity	0.007
141	GO:0032956	regulation of actin cytoskeleton organization	0.007
142	hsa04666	Fc gamma R-mediated phagocytosis	0.007
143	hsa04650	Natural killer cell mediated cytotoxicity	0.007
144	GO:0043552	positive regulation of phosphatidylinositol 3-kinase activity	0.007
145	hsa04960	Aldosterone-regulated sodium reabsorption	0.007
146	GO:0033138	positive regulation of peptidyl-serine phosphorylation	0.007
147	GO:0006919	activation of cysteine-type endopeptidase activity involved in apoptotic process	0.007
148	GO:0005737	cytoplasm	0.007
149	GO:0051000	positive regulation of nitric-oxide synthase activity	0.007
150	GO:0046031	ADP metabolic process	0.007
151	GO:0010918	positive regulation of mitochondrial membrane potential	0.007
152	GO:0043491	protein kinase B signaling	0.007
153	GO:0050679	positive regulation of epithelial cell proliferation	0.007
154	hsa04115	p53 signaling pathway	0.007
155	hsa04310	Wnt signaling pathway	0.007
156	GO:0005938	cell cortex	0.007
157	GO:0042981	regulation of apoptotic process	0.007
158	hsa04920	Adipocytokine signaling pathway	0.007
159	hsa05146	Amoebiasis	0.007
160	GO:0031434	mitogen-activated protein kinase kinase binding	0.007
161	GO:0048009	insulin-like growth factor receptor signaling pathway	0.007
162	GO:0046328	regulation of JNK cascade	0.007
163	GO:0005524	ATP binding	0.007
164	GO:0007411	axon guidance	0.007
165	GO:0002679	respiratory burst involved in defense response	0.007
166	GO:0016301	kinase activity	0.007
167	GO:0071479	cellular response to ionizing radiation	0.007
168	GO:0045944	positive regulation of transcription from RNA polymerase II promoter	0.007
169	GO:0042127	regulation of cell proliferation	0.007
170	GO:0031625	ubiquitin protein ligase binding	0.007
171	GO:0006916	negative regulation of apoptotic process	0.007
172	GO:0009612	response to mechanical stimulus	0.007
173	GO:2000641	regulation of early endosome to late endosome transport	0.007
174	GO:0090170	regulation of Golgi inheritance	0.007
175	GO:0070412	R-SMAD binding	0.007
176	GO:0050927	positive regulation of positive chemotaxis	0.007
177	GO:0030324	lung development	0.007
178	GO:0030316	osteoclast differentiation	0.007
179	GO:0045859	regulation of protein kinase activity	0.007
180	GO:0051092	positive regulation of NF-kappaB transcription factor activity	0.007
181	hsa04930	Type II diabetes mellitus	0.007
182	GO:0031333	negative regulation of protein complex assembly	0.007
183	GO:0045740	positive regulation of DNA replication	0.007
184	GO:0018108	peptidyl-tyrosine phosphorylation	0.007
185	GO:0046931	pore complex assembly	0.007
186	hsa04621	NOD-like receptor signaling pathway	0.007
187	GO:0071780	mitotic cell cycle checkpoint	0.007
188	GO:0030879	mammary gland development	0.007
189	GO:0030690	Noc1p-Noc2p complex	0.007
190	GO:0007569	cell aging	0.007
191	GO:0051412	response to corticosterone	0.007
192	GO:0042059	negative regulation of epidermal growth factor receptor signaling pathway	0.007
193	GO:0045840	positive regulation of mitotic nuclear division	0.007
194	GO:0045453	bone resorption	0.007
195	hsa04720	Long-term potentiation	0.007
196	GO:0030334	regulation of cell migration	0.007
197	GO:0014068	positive regulation of phosphatidylinositol 3-kinase signaling	0.007
198	hsa04350	TGF-beta signaling pathway	0.007
199	GO:0004709	MAP kinase kinase kinase activity	0.007
200	GO:0009887	organ morphogenesis	0.007
201	GO:0010033	response to organic substance	0.007
202	GO:2000278	regulation of DNA biosynthetic process	0.007
203	GO:0019912	cyclin-dependent protein kinase activating kinase activity	0.007
204	GO:0042327	positive regulation of phosphorylation	0.007
205	hsa05152	Tuberculosis	0.007
206	GO:0033077	T cell differentiation in thymus	0.007
207	GO:0010628	positive regulation of gene expression	0.007
208	GO:0051726	regulation of cell cycle	0.007
209	GO:0033598	mammary gland epithelial cell proliferation	0.007
210	GO:0043536	positive regulation of blood vessel endothelial cell migration	0.007
211	GO:0045893	positive regulation of transcription, DNA-templated	0.007
212	GO:0071260	cellular response to mechanical stimulus	0.007
213	GO:0046579	positive regulation of Ras protein signal transduction	0.007
214	GO:0060740	prostate gland epithelium morphogenesis	0.007
215	hsa04360	Axon guidance	0.007
216	GO:0008629	intrinsic apoptotic signaling pathway	0.007
217	GO:0032252	secretory granule localization	0.007
218	GO:0045444	fat cell differentiation	0.007
219	GO:0030838	positive regulation of actin filament polymerization	0.007
220	GO:2000078	positive regulation of type B pancreatic cell development	0.007
221	GO:0043548	phosphatidylinositol 3-kinase binding	0.007
222	GO:0043627	response to estrogen	0.007
223	GO:0048471	perinuclear region of cytoplasm	0.007
224	GO:0060068	vagina development	0.007
225	GO:0035556	intracellular signal transduction	0.007
226	GO:0032868	response to insulin	0.007
227	GO:0070374	positive regulation of ERK1 and ERK2 cascade	0.007
228	GO:0032872	regulation of stress-activated MAPK cascade	0.007
229	GO:2000669	negative regulation of dendritic cell apoptotic process	0.007
230	GO:0042493	response to drug	0.007
231	GO:0007169	transmembrane receptor protein tyrosine kinase signaling pathway	0.007
232	GO:0023014	signal transduction by protein phosphorylation	0.007
233	GO:0070438	obsolete mTOR-FKBP12-rapamycin complex	0.007
234	GO:0006109	regulation of carbohydrate metabolic process	0.007
235	GO:0045725	positive regulation of glycogen biosynthetic process	0.007
236	GO:0048661	positive regulation of smooth muscle cell proliferation	0.007
237	GO:0008545	JUN kinase kinase activity	0.007
238	GO:0032355	response to estradiol	0.007
239	GO:0031435	mitogen-activated protein kinase kinase kinase binding	0.007
240	GO:0045309	protein phosphorylated amino acid binding	0.007
241	GO:0002768	immune response-regulating cell surface receptor signaling pathway	0.007
242	GO:0042593	glucose homeostasis	0.007
243	GO:0030183	B cell differentiation	0.007
244	GO:0001784	phosphotyrosine binding	0.007
245	GO:0031069	hair follicle morphogenesis	0.007
246	GO:0043029	T cell homeostasis	0.007
247	GO:0043410	positive regulation of MAPK cascade	0.007
248	GO:0044212	transcription regulatory region DNA binding	0.007
249	GO:0060154	cellular process regulating host cell cycle in response to virus	0.007
250	GO:0001889	liver development	0.007
251	GO:0003690	double-stranded DNA binding	0.007
252	GO:0033596	TSC1-TSC2 complex	0.007
253	GO:0051668	localization within membrane	0.007
254	GO:0031929	TOR signaling	0.007
255	GO:0043235	receptor complex	0.007
256	GO:0070436	Grb2-EGFR complex	0.007
257	GO:0051384	response to glucocorticoid	0.007
258	GO:0005625	obsolete soluble fraction	0.007
259	GO:0071456	cellular response to hypoxia	0.007
260	GO:0005018	platelet-derived growth factor alpha-receptor activity	0.007
261	GO:2000739	regulation of mesenchymal stem cell differentiation	0.007
262	GO:0035790	platelet-derived growth factor receptor-alpha signaling pathway	0.007
263	GO:0001890	placenta development	0.007
264	hsa04110	Cell cycle	0.007
265	GO:0031175	neuron projection development	0.007
266	GO:0045885	obsolete positive regulation of survival gene product expression	0.007
267	GO:0042326	negative regulation of phosphorylation	0.007
268	GO:0070141	response to UV-A	0.006
269	GO:0002315	marginal zone B cell differentiation	0.006
270	GO:0045792	negative regulation of cell size	0.006
271	GO:0007049	cell cycle	0.006
272	GO:0030616	transforming growth factor beta receptor, common-partner cytoplasmic mediator activity	0.006
273	GO:0042060	wound healing	0.006
274	GO:0046627	negative regulation of insulin receptor signaling pathway	0.006
275	GO:0019904	protein domain specific binding	0.006
276	GO:0000307	cyclin-dependent protein kinase holoenzyme complex	0.006
277	GO:0042692	muscle cell differentiation	0.006
278	GO:0040014	regulation of multicellular organism growth	0.006
279	GO:2000008	regulation of protein localization to cell surface	0.006
280	GO:0030027	lamellipodium	0.006
281	GO:0008022	protein C-terminus binding	0.006
282	GO:0045931	positive regulation of mitotic cell cycle	0.006
283	GO:0035791	platelet-derived growth factor receptor-beta signaling pathway	0.006
284	GO:0005019	platelet-derived growth factor beta-receptor activity	0.006
285	GO:0060681	branch elongation involved in ureteric bud branching	0.006
286	GO:0072163	mesonephric epithelium development	0.006
287	GO:0006974	cellular response to DNA damage stimulus	0.006
288	GO:0043200	response to amino acid	0.006
289	GO:0050730	regulation of peptidyl-tyrosine phosphorylation	0.006
290	GO:0051493	regulation of cytoskeleton organization	0.006
291	GO:0042110	T cell activation	0.006
292	GO:0045766	positive regulation of angiogenesis	0.006
293	GO:0009314	response to radiation	0.006
294	GO:0006469	negative regulation of protein kinase activity	0.006
295	GO:0051435	BH4 domain binding	0.006
296	GO:0051098	regulation of binding	0.006
297	GO:0010243	response to organonitrogen compound	0.006
298	GO:0007435	salivary gland morphogenesis	0.006
299	GO:0030217	T cell differentiation	0.006
300	GO:0001933	negative regulation of protein phosphorylation	0.006
301	GO:0014070	response to organic cyclic compound	0.006
302	GO:0005925	focal adhesion	0.006
303	GO:0030890	positive regulation of B cell proliferation	0.006
304	GO:0005057	receptor signaling protein activity	0.006
305	GO:0043507	positive regulation of JUN kinase activity	0.006
306	GO:0001525	angiogenesis	0.006
307	GO:0045471	response to ethanol	0.006
308	GO:0046982	protein heterodimerization activity	0.006
309	GO:0001779	natural killer cell differentiation	0.006
310	GO:0045429	positive regulation of nitric oxide biosynthetic process	0.006
311	GO:0001666	response to hypoxia	0.006
312	GO:0032026	response to magnesium ion	0.006
313	GO:0072134	nephrogenic mesenchyme morphogenesis	0.006
314	GO:0008637	apoptotic mitochondrial changes	0.006
315	GO:0070417	cellular response to cold	0.006
316	GO:0007179	transforming growth factor beta receptor signaling pathway	0.006
317	GO:0051895	negative regulation of focal adhesion assembly	0.006
318	GO:0060981	cell migration involved in coronary angiogenesis	0.006
319	GO:0071670	smooth muscle cell chemotaxis	0.006
320	GO:0005017	platelet-derived growth factor-activated receptor activity	0.006
321	GO:0043123	positive regulation of I-kappaB kinase/NF-kappaB signaling	0.006
322	hsa05416	Viral myocarditis	0.006
323	hsa04540	Gap junction	0.006
324	GO:0001042	RNA polymerase I core binding	0.006
325	GO:0060209	estrus	0.006
326	GO:0045930	negative regulation of mitotic cell cycle	0.006
327	GO:2000667	positive regulation of interleukin-13 secretion	0.006
328	GO:2000664	positive regulation of interleukin-5 secretion	0.006
329	GO:0030155	regulation of cell adhesion	0.006
330	GO:0001542	ovulation from ovarian follicle	0.006
331	GO:0034988	Fc-gamma receptor I complex binding	0.006
332	GO:0000079	regulation of cyclin-dependent protein serine/threonine kinase activity	0.006
333	GO:0030031	cell projection assembly	0.006
334	GO:0032587	ruffle membrane	0.006
335	GO:0043525	positive regulation of neuron apoptotic process	0.006
336	GO:0043423	3-phosphoinositide-dependent protein kinase binding	0.006
337	GO:0005158	insulin receptor binding	0.006
338	GO:0033192	calmodulin-dependent protein phosphatase activity	0.006
339	GO:0070423	nucleotide-binding oligomerization domain containing signaling pathway	0.006
340	GO:0071285	cellular response to lithium ion	0.006
341	GO:0030889	negative regulation of B cell proliferation	0.006
342	GO:0032270	positive regulation of cellular protein metabolic process	0.006
343	GO:0031532	actin cytoskeleton reorganization	0.006
344	GO:0048538	thymus development	0.006
345	GO:0038007	netrin-activated signaling pathway	0.006
346	GO:0031100	organ regeneration	0.006
347	GO:0009611	response to wounding	0.006
348	GO:0046625	sphingolipid binding	0.006
349	GO:0048617	embryonic foregut morphogenesis	0.006
350	GO:0050821	protein stabilization	0.006
351	GO:0045667	regulation of osteoblast differentiation	0.006
352	GO:0048340	paraxial mesoderm morphogenesis	0.006
353	GO:0048469	cell maturation	0.006
354	GO:0071407	cellular response to organic cyclic compound	0.006
355	GO:0010332	response to gamma radiation	0.006
356	GO:0060396	growth hormone receptor signaling pathway	0.006
357	GO:0031996	thioesterase binding	0.006
358	GO:0005159	insulin-like growth factor receptor binding	0.006
359	GO:0048532	anatomical structure arrangement	0.006
360	GO:0002093	auditory receptor cell morphogenesis	0.006
361	GO:0048262	determination of dorsal/ventral asymmetry	0.006
362	GO:0030997	regulation of centriole-centriole cohesion	0.006
363	GO:0060479	lung cell differentiation	0.006
364	GO:0035112	genitalia morphogenesis	0.006
365	GO:0050731	positive regulation of peptidyl-tyrosine phosphorylation	0.006
366	GO:0004740	pyruvate dehydrogenase (acetyl-transferring) kinase activity	0.006
367	GO:0008134	transcription factor binding	0.006
368	GO:0046022	positive regulation of transcription from RNA polymerase II promoter during mitosis	0.006
369	GO:0018107	peptidyl-threonine phosphorylation	0.006
370	GO:0035441	cell migration involved in vasculogenesis	0.006
371	GO:0051090	regulation of sequence-specific DNA binding transcription factor activity	0.006
372	GO:0097107	postsynaptic density assembly	0.006
373	GO:0033032	regulation of myeloid cell apoptotic process	0.006
374	GO:0031658	negative regulation of cyclin-dependent protein serine/threonine kinase activity involved in G1/S transition of mitotic cell cycle	0.006
375	GO:0090071	negative regulation of ribosome biogenesis	0.006
376	GO:0051717	inositol-1,3,4,5-tetrakisphosphate 3-phosphatase activity	0.006
377	GO:0051800	phosphatidylinositol-3,4-bisphosphate 3-phosphatase activity	0.006
378	GO:0032535	regulation of cellular component size	0.006
379	GO:2000808	negative regulation of synaptic vesicle clustering	0.006
380	GO:0051591	response to cAMP	0.006
381	GO:0035631	CD40 receptor complex	0.006
382	GO:0051149	positive regulation of muscle cell differentiation	0.006
383	GO:0001701	in utero embryonic development	0.006
384	GO:0045765	regulation of angiogenesis	0.006
385	GO:0007620	copulation	0.006
386	GO:0070411	I-SMAD binding	0.006
387	hsa04916	Melanogenesis	0.006
388	GO:0005009	insulin-activated receptor activity	0.006
389	GO:0031405	lipoic acid binding	0.006
390	GO:0046983	protein dimerization activity	0.006
391	GO:0045737	positive regulation of cyclin-dependent protein serine/threonine kinase activity	0.006
392	GO:0046619	optic placode formation involved in camera-type eye formation	0.006
393	GO:0060546	negative regulation of necroptotic process	0.006
394	hsa05014	Amyotrophic lateral sclerosis (ALS)	0.006
395	GO:0055093	response to hyperoxia	0.006
396	GO:0009629	response to gravity	0.006
397	GO:0072262	metanephric glomerular mesangial cell proliferation involved in metanephros development	0.006
398	GO:0046326	positive regulation of glucose import	0.006
399	GO:0042803	protein homodimerization activity	0.006
400	GO:0035066	positive regulation of histone acetylation	0.006
401	GO:0051531	NFAT protein import into nucleus	0.006
402	GO:0005943	phosphatidylinositol 3-kinase complex, class IA	0.006
403	GO:0043551	regulation of phosphatidylinositol 3-kinase activity	0.006
404	GO:0043154	negative regulation of cysteine-type endopeptidase activity involved in apoptotic process	0.006
405	hsa04725	Cholinergic synapse	0.006
406	GO:0051781	positive regulation of cell division	0.006
407	GO:0051091	positive regulation of sequence-specific DNA binding transcription factor activity	0.006
408	GO:0001816	cytokine production	0.006
409	GO:0043652	engulfment of apoptotic cell	0.006
410	GO:0090275	negative regulation of somatostatin secretion	0.006
411	GO:0005168	neurotrophin TRKA receptor binding	0.006
412	GO:0090362	positive regulation of platelet-derived growth factor production	0.006
413	GO:0090271	positive regulation of fibroblast growth factor production	0.006
414	GO:0090336	positive regulation of brown fat cell differentiation	0.006
415	GO:0030308	negative regulation of cell growth	0.006
416	GO:0060644	mammary gland epithelial cell differentiation	0.006
417	GO:0022408	negative regulation of cell-cell adhesion	0.006
418	GO:0050853	B cell receptor signaling pathway	0.006
419	GO:0035022	positive regulation of Rac protein signal transduction	0.006
420	GO:0030010	establishment of cell polarity	0.006
421	GO:0001837	epithelial to mesenchymal transition	0.006
422	GO:0042506	tyrosine phosphorylation of Stat5 protein	0.006
423	GO:0015266	protein channel activity	0.006
424	GO:0007229	integrin-mediated signaling pathway	0.006
425	GO:0005080	protein kinase C binding	0.006
426	GO:0010468	regulation of gene expression	0.006
427	GO:0006461	protein complex assembly	0.006
428	GO:0007595	lactation	0.006
429	GO:0051291	protein heterooligomerization	0.006
430	GO:2001181	positive regulation of interleukin-10 secretion	0.006
431	GO:0050680	negative regulation of epithelial cell proliferation	0.006
432	GO:0006921	cellular component disassembly involved in execution phase of apoptosis	0.006
433	GO:0004992	platelet activating factor receptor activity	0.006
434	GO:0072584	caveolin-mediated endocytosis	0.006
435	GO:0009749	response to glucose	0.006
436	GO:0010573	vascular endothelial growth factor production	0.006
437	GO:0021502	neural fold elevation formation	0.006
438	GO:0051541	elastin metabolic process	0.006
439	GO:0002052	positive regulation of neuroblast proliferation	0.006
440	GO:0051402	neuron apoptotic process	0.006
441	GO:0060244	negative regulation of cell proliferation involved in contact inhibition	0.006
442	GO:2000116	regulation of cysteine-type endopeptidase activity	0.006
443	GO:0039535	regulation of RIG-I signaling pathway	0.006
444	GO:0070266	necroptotic process	0.006
445	GO:0033628	regulation of cell adhesion mediated by integrin	0.006
446	GO:0072277	metanephric glomerular capillary formation	0.006
447	GO:0007420	brain development	0.006
448	GO:0008013	beta-catenin binding	0.006
449	GO:0002250	adaptive immune response	0.006
450	GO:0051592	response to calcium ion	0.006
451	GO:0050681	androgen receptor binding	0.006
452	GO:0002320	lymphoid progenitor cell differentiation	0.006
453	GO:2000060	positive regulation of protein ubiquitination involved in ubiquitin-dependent protein catabolic process	0.006
454	GO:0090400	stress-induced premature senescence	0.006
455	GO:0043005	neuron projection	0.006
456	GO:0043201	response to leucine	0.006
457	GO:0055118	negative regulation of cardiac muscle contraction	0.006
458	GO:0007172	signal complex assembly	0.006
459	GO:0051388	positive regulation of neurotrophin TRK receptor signaling pathway	0.006
460	GO:0060326	cell chemotaxis	0.006
461	GO:0001952	regulation of cell-matrix adhesion	0.006
462	GO:0009636	response to toxic substance	0.006
463	GO:0010748	negative regulation of plasma membrane long-chain fatty acid transport	0.006
464	GO:0042542	response to hydrogen peroxide	0.006
465	GO:0060267	positive regulation of respiratory burst	0.006
466	GO:0048010	vascular endothelial growth factor receptor signaling pathway	0.006
467	GO:0004861	cyclin-dependent protein serine/threonine kinase inhibitor activity	0.006
468	GO:0045425	positive regulation of granulocyte macrophage colony-stimulating factor biosynthetic process	0.006
469	GO:2000657	negative regulation of apolipoprotein binding	0.006
470	GO:0000080	mitotic G1 phase	0.006
471	GO:0003007	heart morphogenesis	0.006
472	GO:0014878	response to electrical stimulus involved in regulation of muscle adaptation	0.006
473	GO:0019900	kinase binding	0.006
474	GO:0048008	platelet-derived growth factor receptor signaling pathway	0.006
475	GO:0032095	regulation of response to food	0.006
476	GO:0000979	RNA polymerase II core promoter sequence-specific DNA binding	0.006
477	GO:0001892	embryonic placenta development	0.006
478	GO:0017015	regulation of transforming growth factor beta receptor signaling pathway	0.006
479	GO:0043303	mast cell degranulation	0.006
480	GO:0045445	myoblast differentiation	0.006
481	GO:0045595	regulation of cell differentiation	0.006
482	GO:0032091	negative regulation of protein binding	0.006
483	GO:0071777	positive regulation of cytokinesis	0.006
484	hsa04622	RIG-I-like receptor signaling pathway	0.006
485	GO:0044430	cytoskeletal part	0.006
486	GO:0009898	cytoplasmic side of plasma membrane	0.006
487	GO:0002551	mast cell chemotaxis	0.006
488	GO:0070373	negative regulation of ERK1 and ERK2 cascade	0.006
489	GO:0014911	positive regulation of smooth muscle cell migration	0.006
490	GO:0008656	cysteine-type endopeptidase activator activity involved in apoptotic process	0.006
491	GO:0070427	nucleotide-binding oligomerization domain containing 1 signaling pathway	0.006
492	GO:0071230	cellular response to amino acid stimulus	0.006
493	GO:0018205	peptidyl-lysine modification	0.006
494	GO:0045648	positive regulation of erythrocyte differentiation	0.006
495	GO:0043366	beta selection	0.006
496	GO:0042307	positive regulation of protein import into nucleus	0.006
497	GO:0043407	negative regulation of MAP kinase activity	0.006
498	hsa05133	Pertussis	0.006
499	GO:0060711	labyrinthine layer development	0.006
500	hsa04530	Tight junction	0.006
501	GO:0010800	positive regulation of peptidyl-threonine phosphorylation	0.006
502	GO:0071681	cellular response to indole-3-methanol	0.006
503	GO:0061326	renal tubule development	0.006
504	GO:0048701	embryonic cranial skeleton morphogenesis	0.006
505	GO:0014850	response to muscle activity	0.006
506	GO:0045180	basal cortex	0.006
507	GO:0038028	insulin receptor signaling pathway via phosphatidylinositol 3-kinase	0.006
508	GO:0033590	response to cobalamin	0.006
509	GO:0006117	acetaldehyde metabolic process	0.006
510	GO:0016314	phosphatidylinositol-3,4,5-trisphosphate 3-phosphatase activity	0.006
511	GO:0007257	activation of JUN kinase activity	0.006
512	GO:0060338	regulation of type I interferon-mediated signaling pathway	0.006
513	GO:0045892	negative regulation of transcription, DNA-templated	0.006
514	GO:0050770	regulation of axonogenesis	0.006
515	GO:0016525	negative regulation of angiogenesis	0.006
516	GO:0004711	ribosomal protein S6 kinase activity	0.006
517	GO:0001782	B cell homeostasis	0.006
518	GO:0007264	small GTPase mediated signal transduction	0.006
519	GO:0032707	negative regulation of interleukin-23 production	0.006
520	GO:0006975	DNA damage induced protein phosphorylation	0.006
521	GO:0004716	receptor signaling protein tyrosine kinase activity	0.006
522	GO:0043125	ErbB-3 class receptor binding	0.006
523	GO:0007254	JNK cascade	0.006
524	GO:0030307	positive regulation of cell growth	0.006
525	GO:0001948	glycoprotein binding	0.006
526	GO:0071506	cellular response to mycophenolic acid	0.006
527	GO:0045083	negative regulation of interleukin-12 biosynthetic process	0.006
528	GO:0060716	labyrinthine layer blood vessel development	0.006
529	hsa05130	Pathogenic Escherichia coli infection	0.006
530	GO:0009408	response to heat	0.006
531	GO:0045668	negative regulation of osteoblast differentiation	0.006
532	GO:0030578	PML body organization	0.006
533	GO:0043124	negative regulation of I-kappaB kinase/NF-kappaB signaling	0.006
534	GO:0034504	protein localization to nucleus	0.006
535	GO:0043280	positive regulation of cysteine-type endopeptidase activity involved in apoptotic process	0.006
536	GO:0005163	nerve growth factor receptor binding	0.006
537	GO:0005161	platelet-derived growth factor receptor binding	0.006
538	GO:0048320	axial mesoderm formation	0.006
539	GO:0034121	regulation of toll-like receptor signaling pathway	0.006
540	GO:0031295	T cell costimulation	0.006
541	GO:0048633	positive regulation of skeletal muscle tissue growth	0.005
542	GO:0005899	insulin receptor complex	0.005
543	GO:0003382	epithelial cell morphogenesis	0.005
544	GO:0001932	regulation of protein phosphorylation	0.005
545	GO:0060376	positive regulation of mast cell differentiation	0.005
546	GO:0003705	transcription factor activity, RNA polymerase II distal enhancer sequence-specific binding	0.005
547	GO:0048407	platelet-derived growth factor binding	0.005
548	GO:0051879	Hsp90 protein binding	0.005
549	hsa05140	Leishmaniasis	0.005
550	GO:0070560	protein secretion by platelet	0.005
551	GO:0060305	regulation of cell diameter	0.005
552	GO:0030845	phospholipase C-inhibiting G-protein coupled receptor signaling pathway	0.005
553	GO:0010920	negative regulation of inositol phosphate biosynthetic process	0.005
554	GO:0010925	positive regulation of inositol-polyphosphate 5-phosphatase activity	0.005
555	GO:0005006	epidermal growth factor-activated receptor activity	0.005
556	GO:0005072	transforming growth factor beta receptor, cytoplasmic mediator activity	0.005
557	GO:0060742	epithelial cell differentiation involved in prostate gland development	0.005
558	GO:0032825	positive regulation of natural killer cell differentiation	0.005
559	GO:0070557	PCNA-p21 complex	0.005
560	GO:0002863	positive regulation of inflammatory response to antigenic stimulus	0.005
561	GO:0007243	intracellular signal transduction	0.005
562	GO:0019371	cyclooxygenase pathway	0.005
563	GO:0004666	prostaglandin-endoperoxide synthase activity	0.005
564	GO:0006007	glucose catabolic process	0.005
565	GO:0002758	innate immune response-activating signal transduction	0.005
566	GO:0051059	NF-kappaB binding	0.005
567	GO:0034644	cellular response to UV	0.005
568	GO:0031529	ruffle organization	0.005
569	GO:0043542	endothelial cell migration	0.005
570	GO:0019087	transformation of host cell by virus	0.005
571	GO:0048570	notochord morphogenesis	0.005
572	GO:0043388	positive regulation of DNA binding	0.005
573	GO:0048514	blood vessel morphogenesis	0.005
574	GO:0032286	central nervous system myelin maintenance	0.005
575	GO:2000145	regulation of cell motility	0.005
576	GO:0030036	actin cytoskeleton organization	0.005
577	GO:0032732	positive regulation of interleukin-1 production	0.005
578	GO:0016046	detection of fungus	0.005
579	GO:0070434	positive regulation of nucleotide-binding oligomerization domain containing 2 signaling pathway	0.005
580	GO:0070430	positive regulation of nucleotide-binding oligomerization domain containing 1 signaling pathway	0.005
581	GO:0004706	JUN kinase kinase kinase activity	0.005
582	GO:0031017	exocrine pancreas development	0.005
583	GO:0032909	regulation of transforming growth factor beta2 production	0.005
584	GO:0048546	digestive tract morphogenesis	0.005
585	GO:0004707	MAP kinase activity	0.005
586	GO:0042098	T cell proliferation	0.005
587	GO:0009967	positive regulation of signal transduction	0.005
588	GO:0001102	RNA polymerase II activating transcription factor binding	0.005
589	GO:0070094	positive regulation of glucagon secretion	0.005
590	GO:0046902	regulation of mitochondrial membrane permeability	0.005
591	GO:0055003	cardiac myofibril assembly	0.005
592	GO:0031668	cellular response to extracellular stimulus	0.005
593	hsa04973	Carbohydrate digestion and absorption	0.005
594	GO:0014740	negative regulation of muscle hyperplasia	0.005
595	GO:0006970	response to osmotic stress	0.005
596	GO:0042058	regulation of epidermal growth factor receptor signaling pathway	0.005
597	GO:0030225	macrophage differentiation	0.005
598	GO:0002605	negative regulation of dendritic cell antigen processing and presentation	0.005
599	GO:0002581	negative regulation of antigen processing and presentation of peptide or polysaccharide antigen via MHC class II	0.005
600	GO:0010751	negative regulation of nitric oxide mediated signal transduction	0.005
601	GO:0010754	negative regulation of cGMP-mediated signaling	0.005
602	GO:0043433	negative regulation of sequence-specific DNA binding transcription factor activity	0.005
603	GO:0045860	positive regulation of protein kinase activity	0.005
604	GO:0001922	B-1 B cell homeostasis	0.005
605	GO:0045415	negative regulation of interleukin-8 biosynthetic process	0.005
606	GO:0031226	intrinsic component of plasma membrane	0.005
607	GO:0071364	cellular response to epidermal growth factor stimulus	0.005
608	GO:0045087	innate immune response	0.005
609	GO:0060045	positive regulation of cardiac muscle cell proliferation	0.005
610	GO:0010594	regulation of endothelial cell migration	0.005
611	GO:0045066	regulatory T cell differentiation	0.005
612	GO:0040023	establishment of nucleus localization	0.005
613	GO:0007281	germ cell development	0.005
614	GO:0050849	negative regulation of calcium-mediated signaling	0.005
615	GO:0045603	positive regulation of endothelial cell differentiation	0.005
616	GO:0070100	negative regulation of chemokine-mediated signaling pathway	0.005
617	GO:0014010	Schwann cell proliferation	0.005
618	GO:0003104	positive regulation of glomerular filtration	0.005
619	GO:0050921	positive regulation of chemotaxis	0.005
620	GO:0007568	aging	0.005
621	GO:0070435	Shc-EGFR complex	0.005
622	GO:0042663	regulation of endodermal cell fate specification	0.005
623	GO:0031663	lipopolysaccharide-mediated signaling pathway	0.005
624	GO:0071338	positive regulation of hair follicle cell proliferation	0.005
625	GO:0035793	positive regulation of metanephric mesenchymal cell migration by platelet-derived growth factor receptor-beta signaling pathway	0.005
626	GO:0001547	antral ovarian follicle growth	0.005
627	GO:0000790	nuclear chromatin	0.005
628	GO:0051389	inactivation of MAPKK activity	0.005
629	GO:0051491	positive regulation of filopodium assembly	0.005
630	GO:2001238	positive regulation of extrinsic apoptotic signaling pathway	0.005
631	GO:0070848	response to growth factor	0.005
632	GO:0030857	negative regulation of epithelial cell differentiation	0.005
633	GO:0061002	negative regulation of dendritic spine morphogenesis	0.005
634	GO:0010718	positive regulation of epithelial to mesenchymal transition	0.005
635	GO:0004715	non-membrane spanning protein tyrosine kinase activity	0.005
636	GO:0001836	release of cytochrome c from mitochondria	0.005
637	GO:0048812	neuron projection morphogenesis	0.005
638	GO:0001953	negative regulation of cell-matrix adhesion	0.005
639	GO:0046642	negative regulation of alpha-beta T cell proliferation	0.005
640	GO:0043434	response to peptide hormone	0.005
641	GO:0002316	follicular B cell differentiation	0.005
642	GO:0042089	cytokine biosynthetic process	0.005
643	GO:0001726	ruffle	0.005
644	GO:0055105	ubiquitin-protein transferase inhibitor activity	0.005
645	GO:0004714	transmembrane receptor protein tyrosine kinase activity	0.005
646	GO:0045599	negative regulation of fat cell differentiation	0.005
647	GO:0031053	primary miRNA processing	0.005
648	GO:0071104	response to interleukin-9	0.005
649	GO:0047485	protein N-terminus binding	0.005
650	GO:0048304	positive regulation of isotype switching to IgG isotypes	0.005
651	GO:0071548	response to dexamethasone	0.005
652	GO:0043402	glucocorticoid mediated signaling pathway	0.005
653	GO:0031946	regulation of glucocorticoid biosynthetic process	0.005
654	GO:0004883	glucocorticoid receptor activity	0.005
655	GO:0072133	metanephric mesenchyme morphogenesis	0.005
656	GO:0048745	smooth muscle tissue development	0.005
657	GO:0050772	positive regulation of axonogenesis	0.005
658	GO:0010595	positive regulation of endothelial cell migration	0.005
659	GO:0019049	evasion or tolerance of host defenses by virus	0.005
660	GO:0005626	obsolete insoluble fraction	0.005
661	GO:0001569	patterning of blood vessels	0.005
662	GO:0043559	insulin binding	0.005
663	GO:0045671	negative regulation of osteoclast differentiation	0.005
664	GO:0070424	regulation of nucleotide-binding oligomerization domain containing signaling pathway	0.005
665	GO:0001541	ovarian follicle development	0.005
666	GO:0031669	cellular response to nutrient levels	0.005
667	GO:0046677	response to antibiotic	0.005
668	GO:0051799	negative regulation of hair follicle development	0.005
669	GO:0001938	positive regulation of endothelial cell proliferation	0.005
670	GO:0006928	movement of cell or subcellular component	0.005
671	GO:0032495	response to muramyl dipeptide	0.005
672	GO:0097241	hematopoietic stem cell migration to bone marrow	0.005
673	GO:0001754	eye photoreceptor cell differentiation	0.005
674	GO:0000980	RNA polymerase II distal enhancer sequence-specific DNA binding	0.005
675	GO:0043314	negative regulation of neutrophil degranulation	0.005
676	GO:0032880	regulation of protein localization	0.005
677	GO:0045786	negative regulation of cell cycle	0.005
678	GO:0032481	positive regulation of type I interferon production	0.005
679	GO:0042508	tyrosine phosphorylation of Stat1 protein	0.005
680	GO:2000553	positive regulation of T-helper 2 cell cytokine production	0.005
681	GO:0019216	regulation of lipid metabolic process	0.005
682	GO:0008384	IkappaB kinase activity	0.005
683	GO:0042770	signal transduction in response to DNA damage	0.005
684	GO:0051056	regulation of small GTPase mediated signal transduction	0.005
685	GO:0051219	phosphoprotein binding	0.005
686	GO:0002040	sprouting angiogenesis	0.005
687	hsa04114	Oocyte meiosis	0.005
688	GO:0048662	negative regulation of smooth muscle cell proliferation	0.005
689	GO:0009441	glycolate metabolic process	0.005
690	GO:0014904	myotube cell development	0.005
691	GO:0014896	muscle hypertrophy	0.005
692	GO:0046825	regulation of protein export from nucleus	0.005
693	GO:0006407	rRNA export from nucleus	0.005
694	GO:0005113	patched binding	0.005
695	GO:0045670	regulation of osteoclast differentiation	0.005
696	GO:0023035	CD40 signaling pathway	0.005
697	GO:0030900	forebrain development	0.005
698	GO:0007259	JAK-STAT cascade	0.005
699	hsa05020	Prion diseases	0.005
700	GO:0050678	regulation of epithelial cell proliferation	0.005
701	GO:0035872	nucleotide-binding domain, leucine rich repeat containing receptor signaling pathway	0.005
702	GO:0033257	Bcl3/NF-kappaB2 complex	0.005
703	GO:0002268	follicular dendritic cell differentiation	0.005
704	GO:0038085	vascular endothelial growth factor binding	0.005
705	GO:0060789	hair follicle placode formation	0.005
706	GO:0031583	phospholipase D-activating G-protein coupled receptor signaling pathway	0.005
707	GO:0042313	protein kinase C deactivation	0.005
708	GO:0031707	endothelin A receptor binding	0.005
709	GO:0031708	endothelin B receptor binding	0.005
710	GO:0031954	positive regulation of protein autophosphorylation	0.005
711	GO:0001658	branching involved in ureteric bud morphogenesis	0.005
712	GO:0060334	regulation of interferon-gamma-mediated signaling pathway	0.005
713	GO:0051797	regulation of hair follicle development	0.005
714	GO:0031264	death-inducing signaling complex	0.005
715	GO:0072678	T cell migration	0.005
716	GO:0070489	T cell aggregation	0.005
717	GO:0034987	immunoglobulin receptor binding	0.005
718	GO:2000666	negative regulation of interleukin-13 secretion	0.005
719	GO:2000663	negative regulation of interleukin-5 secretion	0.005
720	GO:0033267	axon part	0.005
721	GO:0031994	insulin-like growth factor I binding	0.005
722	GO:0032915	positive regulation of transforming growth factor beta2 production	0.005
723	GO:0005667	transcription factor complex	0.005
724	GO:0050727	regulation of inflammatory response	0.005
725	GO:0090263	positive regulation of canonical Wnt signaling pathway	0.005
726	GO:0071363	cellular response to growth factor stimulus	0.005
727	GO:0021881	Wnt-activated signaling pathway involved in forebrain neuron fate commitment	0.005
728	GO:0048557	embryonic digestive tract morphogenesis	0.005
729	GO:0071283	cellular response to iron(III) ion	0.005
730	GO:0060623	regulation of chromosome condensation	0.005
731	GO:0046680	response to DDT	0.005
732	GO:0051987	positive regulation of attachment of spindle microtubules to kinetochore	0.005
733	GO:0002902	regulation of B cell apoptotic process	0.005
734	GO:0051434	BH3 domain binding	0.005
735	GO:0006357	regulation of transcription from RNA polymerase II promoter	0.005
736	GO:0042475	odontogenesis of dentin-containing tooth	0.005
737	GO:0044342	type B pancreatic cell proliferation	0.005
738	GO:2000097	regulation of smooth muscle cell-matrix adhesion	0.005
739	GO:0034351	negative regulation of glial cell apoptotic process	0.005
740	GO:0032613	interleukin-10 production	0.005
741	GO:2000755	positive regulation of sphingomyelin catabolic process	0.005
742	GO:2000753	positive regulation of glucosylceramide catabolic process	0.005
743	GO:0032615	interleukin-12 production	0.005
744	GO:0051490	negative regulation of filopodium assembly	0.005
745	GO:1900163	positive regulation of phospholipid scramblase activity	0.005
746	GO:0070034	telomerase RNA binding	0.005
747	GO:0022616	DNA strand elongation	0.005
748	GO:0003721	telomerase RNA reverse transcriptase activity	0.005
749	GO:0003964	RNA-directed DNA polymerase activity	0.005
750	GO:0000122	negative regulation of transcription from RNA polymerase II promoter	0.005
751	GO:0000189	MAPK import into nucleus	0.005
752	GO:0045787	positive regulation of cell cycle	0.005
753	GO:0032403	protein complex binding	0.005
754	GO:0034750	Scrib-APC-beta-catenin complex	0.005
755	GO:0060425	lung morphogenesis	0.005
756	GO:0031143	pseudopodium	0.005
757	GO:0046628	positive regulation of insulin receptor signaling pathway	0.005
758	GO:0060397	JAK-STAT cascade involved in growth hormone signaling pathway	0.005
759	GO:0002669	positive regulation of T cell anergy	0.005
760	GO:0009790	embryo development	0.005
761	GO:0097191	extrinsic apoptotic signaling pathway	0.005
762	GO:0007369	gastrulation	0.005
763	GO:0016342	catenin complex	0.005
764	GO:0043293	apoptosome	0.005
765	GO:0051496	positive regulation of stress fiber assembly	0.005
766	GO:0014806	smooth muscle hyperplasia	0.005
767	GO:1900224	positive regulation of nodal signaling pathway involved in determination of lateral mesoderm left/right asymmetry	0.005
768	GO:0046875	ephrin receptor binding	0.005
769	GO:0014009	glial cell proliferation	0.005
770	GO:0070555	response to interleukin-1	0.005
771	GO:0071532	ankyrin repeat binding	0.005
772	GO:0032764	negative regulation of mast cell cytokine production	0.005
773	GO:0036120	cellular response to platelet-derived growth factor stimulus	0.005
774	GO:0032228	regulation of synaptic transmission, GABAergic	0.005
775	GO:0070668	positive regulation of mast cell proliferation	0.005
776	GO:0021965	spinal cord ventral commissure morphogenesis	0.005
777	GO:0001954	positive regulation of cell-matrix adhesion	0.005
778	GO:0009880	embryonic pattern specification	0.005
779	GO:0033197	response to vitamin E	0.005
780	GO:0030336	negative regulation of cell migration	0.005
781	GO:0003713	transcription coactivator activity	0.005
782	GO:0070051	fibrinogen binding	0.005
783	GO:0038052	RNA polymerase II transcription factor activity, estrogen-activated sequence-specific DNA binding	0.005
784	GO:0031798	type 1 metabotropic glutamate receptor binding	0.005
785	GO:0002039	p53 binding	0.005
786	GO:0048705	skeletal system morphogenesis	0.005
787	GO:0007167	enzyme linked receptor protein signaling pathway	0.005
788	GO:0048013	ephrin receptor signaling pathway	0.005
789	GO:0090201	negative regulation of release of cytochrome c from mitochondria	0.005
790	GO:0060074	synapse maturation	0.005
791	GO:0070669	response to interleukin-2	0.005
792	GO:2000510	positive regulation of dendritic cell chemotaxis	0.005
793	GO:0033160	positive regulation of protein import into nucleus, translocation	0.005
794	GO:0010907	positive regulation of glucose metabolic process	0.005
795	GO:0001974	blood vessel remodeling	0.005
796	GO:0048298	positive regulation of isotype switching to IgA isotypes	0.005
797	GO:0045343	regulation of MHC class I biosynthetic process	0.005
798	GO:0045579	positive regulation of B cell differentiation	0.005
799	GO:0010763	positive regulation of fibroblast migration	0.005
800	GO:0007183	SMAD protein complex assembly	0.005
801	GO:0048699	generation of neurons	0.005
802	GO:0060117	auditory receptor cell development	0.005
803	GO:2001243	negative regulation of intrinsic apoptotic signaling pathway	0.005
804	hsa04060	Cytokine-cytokine receptor interaction	0.005
805	GO:2000147	positive regulation of cell motility	0.005
806	GO:0001156	TFIIIC-class transcription factor binding	0.005
807	GO:0042169	SH2 domain binding	0.005
808	GO:0097194	execution phase of apoptosis	0.005
809	GO:0008160	protein tyrosine phosphatase activator activity	0.005
810	GO:0071310	cellular response to organic substance	0.005
811	GO:0010758	regulation of macrophage chemotaxis	0.005
812	GO:0042976	activation of Janus kinase activity	0.005
813	GO:2000058	regulation of protein ubiquitination involved in ubiquitin-dependent protein catabolic process	0.005
814	GO:0032960	regulation of inositol trisphosphate biosynthetic process	0.005
815	GO:0030032	lamellipodium assembly	0.005
816	GO:0032331	negative regulation of chondrocyte differentiation	0.005
817	GO:0046332	SMAD binding	0.005
818	GO:2000342	negative regulation of chemokine (C-X-C motif) ligand 2 production	0.005
819	GO:0046889	positive regulation of lipid biosynthetic process	0.005
820	GO:0032088	negative regulation of NF-kappaB transcription factor activity	0.005
821	GO:0005768	endosome	0.005
822	GO:0007258	JUN phosphorylation	0.005
823	GO:0035014	phosphatidylinositol 3-kinase regulator activity	0.005
824	GO:0043409	negative regulation of MAPK cascade	0.005
825	GO:0007519	skeletal muscle tissue development	0.005
826	GO:0000301	retrograde transport, vesicle recycling within Golgi	0.005
827	GO:0007352	zygotic specification of dorsal/ventral axis	0.005
828	GO:0003056	regulation of vascular smooth muscle contraction	0.005
829	GO:0071141	SMAD protein complex	0.005
830	GO:0035295	tube development	0.005
831	GO:0048666	neuron development	0.005
832	GO:0043089	positive regulation of GTPase activity	0.005
833	GO:0051896	regulation of protein kinase B signaling	0.005
834	GO:0070101	positive regulation of chemokine-mediated signaling pathway	0.005
835	GO:0021551	central nervous system morphogenesis	0.005
836	GO:0014912	negative regulation of smooth muscle cell migration	0.005
837	GO:0043392	negative regulation of DNA binding	0.005
838	GO:0004721	phosphoprotein phosphatase activity	0.005
839	GO:0019100	male germ-line sex determination	0.005
840	GO:0032467	positive regulation of cytokinesis	0.005
841	GO:0001709	cell fate determination	0.005
842	GO:0005164	tumor necrosis factor receptor binding	0.005
843	GO:0045945	positive regulation of transcription from RNA polymerase III promoter	0.005
844	GO:0019218	regulation of steroid metabolic process	0.005
845	GO:0046543	development of secondary female sexual characteristics	0.005
846	GO:0030617	transforming growth factor beta receptor, inhibitory cytoplasmic mediator activity	0.005
847	GO:0005070	SH3/SH2 adaptor activity	0.005
848	GO:0010801	negative regulation of peptidyl-threonine phosphorylation	0.005
849	GO:0046666	retinal cell programmed cell death	0.005
850	GO:0033561	regulation of water loss via skin	0.005
851	GO:0071455	cellular response to hyperoxia	0.005
852	GO:0001503	ossification	0.005
853	GO:0045165	cell fate commitment	0.005
854	GO:0021831	embryonic olfactory bulb interneuron precursor migration	0.005
855	GO:0045084	positive regulation of interleukin-12 biosynthetic process	0.005
856	GO:0048597	post-embryonic camera-type eye morphogenesis	0.005
857	GO:0002352	B cell negative selection	0.005
858	GO:0097136	Bcl-2 family protein complex	0.005
859	GO:0010863	positive regulation of phospholipase C activity	0.005
860	GO:0071277	cellular response to calcium ion	0.005
861	GO:0045023	G0 to G1 transition	0.005
862	GO:0004699	calcium-independent protein kinase C activity	0.005
863	GO:0060484	lung-associated mesenchyme development	0.005
864	GO:0060751	branch elongation involved in mammary gland duct branching	0.005
865	GO:0009817	defense response to fungus, incompatible interaction	0.005
866	GO:0002460	adaptive immune response based on somatic recombination of immune receptors built from immunoglobulin superfamily domains	0.005
867	GO:1900126	negative regulation of hyaluronan biosynthetic process	0.005
868	GO:0010833	telomere maintenance via telomere lengthening	0.005
869	GO:0030100	regulation of endocytosis	0.005
870	GO:0030282	bone mineralization	0.005
871	GO:0048565	digestive tract development	0.005
872	GO:0060736	prostate gland growth	0.005
873	GO:0002572	pro-T cell differentiation	0.005
874	GO:0019858	cytosine metabolic process	0.005
875	GO:0042246	tissue regeneration	0.005
876	GO:0007166	cell surface receptor signaling pathway	0.005
877	GO:0048239	negative regulation of DNA recombination at telomere	0.005
878	GO:0034446	substrate adhesion-dependent cell spreading	0.005
879	GO:0071156	regulation of cell cycle arrest	0.005
880	GO:0051893	regulation of focal adhesion assembly	0.005
881	GO:0043017	positive regulation of lymphotoxin A biosynthetic process	0.005
882	GO:0002537	nitric oxide production involved in inflammatory response	0.005
883	GO:0045236	CXCR chemokine receptor binding	0.005
884	GO:0061041	regulation of wound healing	0.005
885	GO:0001047	core promoter binding	0.005
886	GO:0055070	copper ion homeostasis	0.005
887	GO:0032077	positive regulation of deoxyribonuclease activity	0.005
888	GO:0043626	PCNA complex	0.005
889	GO:0000701	purine-specific mismatch base pair DNA N-glycosylase activity	0.005
890	GO:0060125	negative regulation of growth hormone secretion	0.005
891	GO:0051463	negative regulation of cortisol secretion	0.005
892	GO:0016048	detection of temperature stimulus	0.005
893	GO:0048318	axial mesoderm development	0.005
894	GO:0032444	activin responsive factor complex	0.005
895	GO:0017016	Ras GTPase binding	0.005
896	GO:0071480	cellular response to gamma radiation	0.005
897	GO:0002248	connective tissue replacement involved in inflammatory response wound healing	0.005
898	GO:0034747	beta-catenin destruction complex	0.005
899	GO:0043586	tongue development	0.005
900	GO:0045597	positive regulation of cell differentiation	0.005
901	GO:0042523	positive regulation of tyrosine phosphorylation of Stat5 protein	0.005
902	GO:0060178	regulation of exocyst localization	0.005
903	GO:0001928	regulation of exocyst assembly	0.005
904	GO:0051019	mitogen-activated protein kinase binding	0.005
905	GO:0010522	regulation of calcium ion transport into cytosol	0.005
906	GO:0032938	negative regulation of translation in response to oxidative stress	0.005
907	GO:0042406	extrinsic component of endoplasmic reticulum membrane	0.005
908	GO:0090037	positive regulation of protein kinase C signaling	0.005
909	GO:0031490	chromatin DNA binding	0.005
910	GO:0021837	motogenic signaling involved in postnatal olfactory bulb interneuron migration	0.005
911	GO:0045596	negative regulation of cell differentiation	0.005
912	GO:0048378	regulation of lateral mesodermal cell fate specification	0.005
913	GO:0045669	positive regulation of osteoblast differentiation	0.005
914	GO:0033256	I-kappaB/NF-kappaB complex	0.005
915	GO:2000552	negative regulation of T-helper 2 cell cytokine production	0.005
916	GO:0032916	positive regulation of transforming growth factor beta3 production	0.005
917	GO:0005757	mitochondrial permeability transition pore complex	0.005
918	GO:0001822	kidney development	0.005
919	GO:0032976	release of matrix enzymes from mitochondria	0.005
920	GO:0046674	retinal cell apoptotic process	0.005
921	GO:0050816	phosphothreonine binding	0.005
922	GO:0005010	insulin-like growth factor-activated receptor activity	0.005
923	GO:0033687	osteoblast proliferation	0.005
924	GO:0014040	positive regulation of Schwann cell differentiation	0.005
925	GO:0071347	cellular response to interleukin-1	0.005
926	GO:0005154	epidermal growth factor receptor binding	0.005
927	GO:0001649	osteoblast differentiation	0.005
928	GO:0010310	regulation of hydrogen peroxide metabolic process	0.005
929	GO:0030837	negative regulation of actin filament polymerization	0.005
930	GO:0045950	negative regulation of mitotic recombination	0.005
931	GO:0032870	cellular response to hormone stimulus	0.005
932	GO:0046626	regulation of insulin receptor signaling pathway	0.005
933	GO:0045736	negative regulation of cyclin-dependent protein serine/threonine kinase activity	0.005
934	GO:0051602	response to electrical stimulus	0.005
935	GO:0033689	negative regulation of osteoblast proliferation	0.005
936	GO:0071340	skeletal muscle acetylcholine-gated channel clustering	0.005
937	GO:0043394	proteoglycan binding	0.005
938	GO:0042176	regulation of protein catabolic process	0.005
939	GO:0045197	establishment or maintenance of epithelial cell apical/basal polarity	0.005
940	GO:0031670	cellular response to nutrient	0.005
941	GO:2000353	positive regulation of endothelial cell apoptotic process	0.005
942	GO:0007262	STAT protein import into nucleus	0.005
943	GO:0043276	anoikis	0.005
944	GO:0060395	SMAD protein signal transduction	0.005
945	GO:0032007	negative regulation of TOR signaling	0.005
946	GO:0035116	embryonic hindlimb morphogenesis	0.005
947	GO:0032648	regulation of interferon-beta production	0.005
948	GO:0031851	kappa-type opioid receptor binding	0.005
949	GO:0051771	negative regulation of nitric-oxide synthase biosynthetic process	0.005
950	GO:0010976	positive regulation of neuron projection development	0.005
951	GO:0042497	triacyl lipopeptide binding	0.005
952	GO:0042892	chloramphenicol transport	0.005
953	GO:0052063	induction by symbiont of defense-related host nitric oxide production	0.005
954	GO:0032496	response to lipopolysaccharide	0.005
955	GO:0008635	activation of cysteine-type endopeptidase activity involved in apoptotic process by cytochrome c	0.005
956	GO:0018106	peptidyl-histidine phosphorylation	0.005
957	GO:0070723	response to cholesterol	0.005
958	GO:0010909	positive regulation of heparan sulfate proteoglycan biosynthetic process	0.005
959	GO:0044334	canonical Wnt signaling pathway involved in positive regulation of epithelial to mesenchymal transition	0.005
960	GO:0070369	beta-catenin-TCF7L2 complex	0.005
961	GO:0001759	organ induction	0.005
962	GO:0031666	positive regulation of lipopolysaccharide-mediated signaling pathway	0.005
963	GO:2000707	positive regulation of dense core granule biogenesis	0.005
964	GO:0001076	transcription factor activity, RNA polymerase II transcription factor binding	0.005
965	GO:0045086	positive regulation of interleukin-2 biosynthetic process	0.005
966	GO:2000304	positive regulation of ceramide biosynthetic process	0.005
967	GO:0001764	neuron migration	0.005
968	GO:0005174	CD40 receptor binding	0.005
969	GO:0001205	transcriptional activator activity, RNA polymerase II distal enhancer sequence-specific binding	0.005
970	GO:0045821	positive regulation of glycolytic process	0.005
971	GO:0032695	negative regulation of interleukin-12 production	0.005
972	GO:0050999	regulation of nitric-oxide synthase activity	0.005
973	GO:0045943	positive regulation of transcription from RNA polymerase I promoter	0.005
974	GO:0007528	neuromuscular junction development	0.005
975	hsa04730	Long-term depression	0.005
976	GO:0090004	positive regulation of establishment of protein localization to plasma membrane	0.005
977	GO:0043006	activation of phospholipase A2 activity by calcium-mediated signaling	0.005
978	GO:0072079	nephron tubule formation	0.005
979	GO:0051400	BH domain binding	0.005
980	GO:0005900	oncostatin-M receptor complex	0.005
981	GO:0000060	protein import into nucleus, translocation	0.005
982	GO:0021775	smoothened signaling pathway involved in ventral spinal cord interneuron specification	0.005
983	GO:0021776	smoothened signaling pathway involved in spinal cord motor neuron cell fate specification	0.005
984	GO:2001240	negative regulation of extrinsic apoptotic signaling pathway in absence of ligand	0.005
985	GO:0046898	response to cycloheximide	0.005
986	GO:0045408	regulation of interleukin-6 biosynthetic process	0.005
987	GO:0001947	heart looping	0.005
988	GO:0007492	endoderm development	0.005
989	GO:0071542	dopaminergic neuron differentiation	0.005
990	GO:0033552	response to vitamin B3	0.005
991	GO:0032757	positive regulation of interleukin-8 production	0.005
992	GO:0035497	cAMP response element binding	0.005
993	GO:0048169	regulation of long-term neuronal synaptic plasticity	0.005
994	GO:0002051	osteoblast fate commitment	0.005
995	GO:0010634	positive regulation of epithelial cell migration	0.005
996	GO:0033673	negative regulation of kinase activity	0.005
997	GO:0032715	negative regulation of interleukin-6 production	0.005
998	GO:0051247	positive regulation of protein metabolic process	0.005
999	GO:0072110	glomerular mesangial cell proliferation	0.005
1000	GO:0033233	regulation of protein sumoylation	0.005
1001	GO:0072303	positive regulation of glomerular metanephric mesangial cell proliferation	0.005
1002	GO:0019838	growth factor binding	0.005
1003	GO:0043148	mitotic spindle organization	0.005
1004	GO:0007219	Notch signaling pathway	0.005
1005	GO:0030512	negative regulation of transforming growth factor beta receptor signaling pathway	0.005
1006	GO:0005068	transmembrane receptor protein tyrosine kinase adaptor activity	0.005
1007	GO:0009615	response to virus	0.005
1008	GO:0005008	hepatocyte growth factor-activated receptor activity	0.005
1009	GO:0014812	muscle cell migration	0.005
1010	GO:0043497	regulation of protein heterodimerization activity	0.005
1011	GO:0032237	activation of store-operated calcium channel activity	0.005
1012	GO:0032720	negative regulation of tumor necrosis factor production	0.005
1013	GO:0008634	obsolete negative regulation of survival gene product expression	0.005
1014	GO:0070301	cellular response to hydrogen peroxide	0.005
1015	GO:0035491	positive regulation of leukotriene production involved in inflammatory response	0.005
1016	GO:0071258	cellular response to gravity	0.005
1017	GO:0061044	negative regulation of vascular wound healing	0.005
1018	GO:0038091	positive regulation of cell proliferation by VEGF-activated platelet derived growth factor receptor signaling pathway	0.005
1019	GO:0055100	adiponectin binding	0.005
1020	GO:0042993	positive regulation of transcription factor import into nucleus	0.005
1021	GO:0070887	cellular response to chemical stimulus	0.005
1022	GO:2000573	positive regulation of DNA biosynthetic process	0.005
1023	GO:0071850	mitotic cell cycle arrest	0.005
1024	GO:0071899	negative regulation of estrogen receptor binding	0.005
1025	GO:0060513	prostatic bud formation	0.005
1026	GO:0031063	regulation of histone deacetylation	0.005
1027	GO:0030902	hindbrain development	0.005
1028	GO:0010575	positive regulation of vascular endothelial growth factor production	0.005
1029	GO:0030856	regulation of epithelial cell differentiation	0.005
1030	GO:2001241	positive regulation of extrinsic apoptotic signaling pathway in absence of ligand	0.005
1031	GO:0002675	positive regulation of acute inflammatory response	0.005
1032	GO:0033593	BRCA2-MAGE-D1 complex	0.005
1033	GO:0031619	homologous chromosome orientation involved in meiotic metaphase I plate congression	0.005
1034	GO:0030742	GTP-dependent protein binding	0.005
1035	GO:0001085	RNA polymerase II transcription factor binding	0.005
1036	GO:0006470	protein dephosphorylation	0.005
1037	GO:0002062	chondrocyte differentiation	0.005
1038	GO:0035409	histone H3-Y41 phosphorylation	0.005
1039	GO:0008636	obsolete activation of caspase activity by protein phosphorylation	0.005
1040	GO:0031959	mineralocorticoid receptor signaling pathway	0.005
1041	GO:0035401	histone kinase activity (H3-Y41 specific)	0.005
1042	GO:0031397	negative regulation of protein ubiquitination	0.005
1043	GO:0042063	gliogenesis	0.005
1044	GO:0030618	transforming growth factor beta receptor, pathway-specific cytoplasmic mediator activity	0.005
1045	GO:0050771	negative regulation of axonogenesis	0.005
1046	GO:0008630	intrinsic apoptotic signaling pathway in response to DNA damage	0.005
1047	GO:0035624	receptor transactivation	0.005
1048	GO:0071351	cellular response to interleukin-18	0.005
1049	GO:0060552	positive regulation of fructose 1,6-bisphosphate metabolic process	0.005
1050	GO:2000309	positive regulation of tumor necrosis factor (ligand) superfamily member 11 production	0.005
1051	GO:0060550	positive regulation of fructose 1,6-bisphosphate 1-phosphatase activity	0.005
1052	GO:0044146	negative regulation of growth of symbiont involved in interaction with host	0.005
1053	GO:0042119	neutrophil activation	0.005
1054	GO:0045630	positive regulation of T-helper 2 cell differentiation	0.005
1055	GO:0035259	glucocorticoid receptor binding	0.005
1056	GO:0060039	pericardium development	0.005
1057	GO:0060374	mast cell differentiation	0.005
1058	GO:0030097	hemopoiesis	0.005
1059	GO:1900127	positive regulation of hyaluronan biosynthetic process	0.005
1060	GO:0045732	positive regulation of protein catabolic process	0.005
1061	GO:0048041	focal adhesion assembly	0.005
1062	GO:0034612	response to tumor necrosis factor	0.005
1063	GO:0042045	epithelial fluid transport	0.005
1064	GO:0043517	positive regulation of DNA damage response, signal transduction by p53 class mediator	0.005
1065	GO:0048762	mesenchymal cell differentiation	0.005
1066	GO:0001775	cell activation	0.005
1067	GO:2000017	positive regulation of determination of dorsal identity	0.005
1068	GO:0050321	tau-protein kinase activity	0.005
1069	GO:0050873	brown fat cell differentiation	0.005
1070	GO:0060445	branching involved in salivary gland morphogenesis	0.005
1071	GO:0001657	ureteric bud development	0.005
1072	GO:0045785	positive regulation of cell adhesion	0.005
1073	GO:0046686	response to cadmium ion	0.005
1074	GO:0060998	regulation of dendritic spine development	0.005
1075	GO:0051894	positive regulation of focal adhesion assembly	0.005
1076	GO:0060729	intestinal epithelial structure maintenance	0.005
1077	GO:0070530	K63-linked polyubiquitin binding	0.005
1078	GO:0017134	fibroblast growth factor binding	0.005
1079	GO:0005147	oncostatin-M receptor binding	0.005
1080	GO:0010991	negative regulation of SMAD protein complex assembly	0.005
1081	GO:0060615	mammary gland bud formation	0.004
1082	GO:0060915	mesenchymal cell differentiation involved in lung development	0.004
1083	GO:0060595	fibroblast growth factor receptor signaling pathway involved in mammary gland specification	0.004
1084	GO:0060667	branch elongation involved in salivary gland morphogenesis	0.004
1085	GO:0042100	B cell proliferation	0.004
1086	GO:0032203	telomere formation via telomerase	0.004
1087	GO:0033189	response to vitamin A	0.004
1088	GO:0033148	positive regulation of intracellular estrogen receptor signaling pathway	0.004
1089	GO:0003183	mitral valve morphogenesis	0.004
1090	GO:0032700	negative regulation of interleukin-17 production	0.004
1091	GO:0030098	lymphocyte differentiation	0.004
1092	GO:0044346	fibroblast apoptotic process	0.004
1093	GO:2001220	obsolete negative regulation of G2 phase of mitotic cell cycle	0.004
1094	GO:0090096	positive regulation of metanephric cap mesenchymal cell proliferation	0.004
1095	GO:0032516	positive regulation of phosphoprotein phosphatase activity	0.004
1096	GO:0001817	regulation of cytokine production	0.004
1097	GO:0033280	response to vitamin D	0.004
1098	GO:0090330	regulation of platelet aggregation	0.004
1099	GO:0032928	regulation of superoxide anion generation	0.004
1100	GO:0045401	positive regulation of interleukin-3 biosynthetic process	0.004
1101	GO:0090237	regulation of arachidonic acid secretion	0.004
1102	GO:0071226	cellular response to molecule of fungal origin	0.004
1103	GO:0043313	regulation of neutrophil degranulation	0.004
1104	GO:0060179	male mating behavior	0.004
1105	GO:0052547	regulation of peptidase activity	0.004
1106	GO:0032959	inositol trisphosphate biosynthetic process	0.004
1107	GO:0001556	oocyte maturation	0.004
1108	GO:0035402	histone kinase activity (H3-T11 specific)	0.004
1109	GO:0035407	histone H3-T11 phosphorylation	0.004
1110	GO:0043588	skin development	0.004
1111	GO:0002763	positive regulation of myeloid leukocyte differentiation	0.004
1112	GO:0045065	cytotoxic T cell differentiation	0.004
1113	GO:0010613	positive regulation of cardiac muscle hypertrophy	0.004
1114	hsa05143	African trypanosomiasis	0.004
1115	GO:0070168	negative regulation of biomineral tissue development	0.004
1116	GO:2000538	positive regulation of B cell chemotaxis	0.004
1117	GO:0004697	protein kinase C activity	0.004
1118	GO:0060603	mammary gland duct morphogenesis	0.004
1119	GO:0072255	metanephric glomerular mesangial cell development	0.004
1120	GO:0072264	metanephric glomerular endothelium development	0.004
1121	GO:2000591	positive regulation of metanephric mesenchymal cell migration	0.004
1122	GO:0072126	positive regulation of glomerular mesangial cell proliferation	0.004
1123	GO:0001710	mesodermal cell fate commitment	0.004
1124	GO:0007252	I-kappaB phosphorylation	0.004
1125	GO:0007584	response to nutrient	0.004
1126	GO:0021508	floor plate formation	0.004
1127	GO:0042113	B cell activation	0.004
1128	GO:0051964	negative regulation of synapse assembly	0.004
1129	GO:0001077	transcriptional activator activity, RNA polymerase II core promoter proximal region sequence-specific binding	0.004
1130	GO:0034333	adherens junction assembly	0.004
1131	GO:0048678	response to axon injury	0.004
1132	GO:0032319	regulation of GTPase activity	0.004
1133	GO:0030510	regulation of BMP signaling pathway	0.004
1134	GO:0030593	neutrophil chemotaxis	0.004
1135	GO:0060032	notochord regression	0.004
1136	GO:0045082	positive regulation of interleukin-10 biosynthetic process	0.004
1137	GO:0005007	fibroblast growth factor-activated receptor activity	0.004
1138	GO:0032298	positive regulation of DNA-dependent DNA replication initiation	0.004
1139	GO:0042771	intrinsic apoptotic signaling pathway in response to DNA damage by p53 class mediator	0.004
1140	GO:0010002	cardioblast differentiation	0.004
1141	GO:0031995	insulin-like growth factor II binding	0.004
1142	GO:0030521	androgen receptor signaling pathway	0.004
1143	GO:2001234	negative regulation of apoptotic signaling pathway	0.004
1144	GO:0048753	pigment granule organization	0.004
1145	GO:0032848	negative regulation of cellular pH reduction	0.004
1146	GO:0043375	CD8-positive, alpha-beta T cell lineage commitment	0.004
1147	GO:0048743	positive regulation of skeletal muscle fiber development	0.004
1148	GO:0022898	regulation of transmembrane transporter activity	0.004
1149	GO:0014042	positive regulation of neuron maturation	0.004
1150	GO:0001012	RNA polymerase II regulatory region DNA binding	0.004
1151	GO:0031523	Myb complex	0.004
1152	GO:0030426	growth cone	0.004
1153	GO:0033601	positive regulation of mammary gland epithelial cell proliferation	0.004
1154	GO:0090005	negative regulation of establishment of protein localization to plasma membrane	0.004
1155	GO:0007403	glial cell fate determination	0.004
1156	GO:0002366	leukocyte activation involved in immune response	0.004
1157	GO:0035726	common myeloid progenitor cell proliferation	0.004
1158	GO:0032147	activation of protein kinase activity	0.004
1159	GO:0035089	establishment of apical/basal cell polarity	0.004
1160	GO:0048012	hepatocyte growth factor receptor signaling pathway	0.004
1161	GO:0010906	regulation of glucose metabolic process	0.004
1162	GO:0035669	TRAM-dependent toll-like receptor 4 signaling pathway	0.004
1163	GO:2001031	positive regulation of cellular glucuronidation	0.004
1164	GO:0001558	regulation of cell growth	0.004
1165	GO:0051450	myoblast proliferation	0.004
1166	GO:0005035	death receptor activity	0.004
1167	GO:0010512	negative regulation of phosphatidylinositol biosynthetic process	0.004
1168	GO:0060527	prostate epithelial cord arborization involved in prostate glandular acinus morphogenesis	0.004
1169	GO:0060177	regulation of angiotensin metabolic process	0.004
1170	GO:0009103	lipopolysaccharide biosynthetic process	0.004
1171	GO:0001743	optic placode formation	0.004
1172	GO:0051248	negative regulation of protein metabolic process	0.004
1173	GO:0060823	canonical Wnt signaling pathway involved in neural plate anterior/posterior pattern formation	0.004
1174	GO:0042346	positive regulation of NF-kappaB import into nucleus	0.004
1175	GO:0045713	low-density lipoprotein particle receptor biosynthetic process	0.004
1176	GO:0004955	prostaglandin receptor activity	0.004
1177	GO:0060694	regulation of cholesterol transporter activity	0.004
1178	GO:0005543	phospholipid binding	0.004
1179	GO:0061045	negative regulation of wound healing	0.004
1180	GO:0007354	zygotic determination of anterior/posterior axis, embryo	0.004
1181	GO:0060529	squamous basal epithelial stem cell differentiation involved in prostate gland acinus development	0.004
1182	GO:0060601	lateral sprouting from an epithelium	0.004
1183	GO:0035603	fibroblast growth factor receptor signaling pathway involved in hemopoiesis	0.004
1184	GO:0035604	fibroblast growth factor receptor signaling pathway involved in positive regulation of cell proliferation in bone marrow	0.004
1185	GO:0010453	regulation of cell fate commitment	0.004
1186	GO:0035602	fibroblast growth factor receptor signaling pathway involved in negative regulation of apoptotic process in bone marrow	0.004
1187	GO:0070671	response to interleukin-12	0.004
1188	GO:0010942	positive regulation of cell death	0.004
1189	GO:0001702	gastrulation with mouth forming second	0.004
1190	GO:0072308	negative regulation of metanephric nephron tubule epithelial cell differentiation	0.004
1191	GO:0038092	nodal signaling pathway	0.004
1192	GO:0042660	positive regulation of cell fate specification	0.004
1193	GO:0045655	regulation of monocyte differentiation	0.004
1194	GO:0032479	regulation of type I interferon production	0.004
1195	GO:0032607	interferon-alpha production	0.004
1196	GO:0034127	regulation of MyD88-independent toll-like receptor signaling pathway	0.004
1197	GO:0090200	positive regulation of release of cytochrome c from mitochondria	0.004
1198	GO:0045582	positive regulation of T cell differentiation	0.004
1199	GO:0031647	regulation of protein stability	0.004
1200	GO:0060056	mammary gland involution	0.004
1201	GO:0032741	positive regulation of interleukin-18 production	0.004
1202	GO:0017160	Ral GTPase binding	0.004
1203	GO:0035690	cellular response to drug	0.004
1204	GO:0032154	cleavage furrow	0.004
1205	GO:0050729	positive regulation of inflammatory response	0.004
1206	GO:0061298	retina vasculature development in camera-type eye	0.004
1207	GO:0010248	establishment or maintenance of transmembrane electrochemical gradient	0.004
1208	GO:0019043	establishment of viral latency	0.004
1209	GO:0000279	M phase	0.004
1210	GO:0090230	regulation of centromere complex assembly	0.004
1211	GO:0090090	negative regulation of canonical Wnt signaling pathway	0.004
1212	GO:0004676	3-phosphoinositide-dependent protein kinase activity	0.004
1213	GO:0005125	cytokine activity	0.004
1214	GO:0061047	positive regulation of branching involved in lung morphogenesis	0.004
1215	GO:0030284	estrogen receptor activity	0.004
1216	GO:0016176	superoxide-generating NADPH oxidase activator activity	0.004
1217	GO:0007440	foregut morphogenesis	0.004
1218	GO:0003270	Notch signaling pathway involved in regulation of secondary heart field cardioblast proliferation	0.004
1219	GO:0003160	endocardium morphogenesis	0.004
1220	GO:0003264	regulation of cardioblast proliferation	0.004
1221	GO:0061419	positive regulation of transcription from RNA polymerase II promoter in response to hypoxia	0.004
1222	GO:0014807	regulation of somitogenesis	0.004
1223	GO:0021515	cell differentiation in spinal cord	0.004
1224	GO:0014732	skeletal muscle atrophy	0.004
1225	GO:0032515	negative regulation of phosphoprotein phosphatase activity	0.004
1226	GO:0030295	protein kinase activator activity	0.004
1227	GO:0031284	positive regulation of guanylate cyclase activity	0.004
1228	GO:0010224	response to UV-B	0.004
1229	GO:0035026	leading edge cell differentiation	0.004
1230	GO:0060766	negative regulation of androgen receptor signaling pathway	0.004
1231	GO:0035774	positive regulation of insulin secretion involved in cellular response to glucose stimulus	0.004
1232	GO:0032089	NACHT domain binding	0.004
1233	GO:0032963	collagen metabolic process	0.004
1234	GO:0007060	male meiosis chromosome segregation	0.004
1235	GO:0051257	meiotic spindle midzone assembly	0.004
1236	GO:0043060	meiotic metaphase I plate congression	0.004
1237	GO:0032608	interferon-beta production	0.004
1238	GO:0051770	positive regulation of nitric-oxide synthase biosynthetic process	0.004
1239	GO:0001570	vasculogenesis	0.004
1240	GO:0090031	positive regulation of steroid hormone biosynthetic process	0.004
1241	hsa05144	Malaria	0.004
1242	GO:0050711	negative regulation of interleukin-1 secretion	0.004
1243	GO:0030178	negative regulation of Wnt signaling pathway	0.004
1244	GO:0008432	JUN kinase binding	0.004
1245	GO:0097178	ruffle assembly	0.004
1246	GO:0043380	regulation of memory T cell differentiation	0.004
1247	GO:0033145	positive regulation of intracellular steroid hormone receptor signaling pathway	0.004
1248	GO:0010421	hydrogen peroxide-mediated programmed cell death	0.004
1249	GO:0033484	nitric oxide homeostasis	0.004
1250	GO:0010905	negative regulation of UDP-glucose catabolic process	0.004
1251	GO:0071879	positive regulation of adrenergic receptor signaling pathway	0.004
1252	GO:0061052	negative regulation of cell growth involved in cardiac muscle cell development	0.004
1253	GO:0010592	positive regulation of lamellipodium assembly	0.004
1254	GO:0042826	histone deacetylase binding	0.004
1255	GO:0051645	Golgi localization	0.004
1256	GO:0061026	cardiac muscle tissue regeneration	0.004
1257	GO:0033613	activating transcription factor binding	0.004
1258	GO:0002576	platelet degranulation	0.004
1259	GO:0060420	regulation of heart growth	0.004
1260	GO:0042517	positive regulation of tyrosine phosphorylation of Stat3 protein	0.004
1261	GO:0003290	atrial septum secundum morphogenesis	0.004
1262	GO:0045638	negative regulation of myeloid cell differentiation	0.004
1263	GO:0002575	basophil chemotaxis	0.004
1264	GO:0033129	positive regulation of histone phosphorylation	0.004
1265	GO:0007256	activation of JNKK activity	0.004
1266	GO:0031648	protein destabilization	0.004
1267	GO:0001959	regulation of cytokine-mediated signaling pathway	0.004
1268	GO:0000806	Y chromosome	0.004
1269	GO:0000805	X chromosome	0.004
1270	GO:0051250	negative regulation of lymphocyte activation	0.004
1271	GO:0071356	cellular response to tumor necrosis factor	0.004
1272	GO:0042488	positive regulation of odontogenesis of dentin-containing tooth	0.004
1273	GO:2000522	positive regulation of immunological synapse formation	0.004
1274	GO:0038117	C-C motif chemokine 19 receptor activity	0.004
1275	GO:0035758	chemokine (C-C motif) ligand 21 binding	0.004
1276	GO:0050706	regulation of interleukin-1 beta secretion	0.004
1277	GO:0032649	regulation of interferon-gamma production	0.004
1278	GO:2000526	positive regulation of glycoprotein biosynthetic process involved in immunological synapse formation	0.004
1279	GO:0038121	C-C motif chemokine 21 receptor activity	0.004
1280	GO:0035757	chemokine (C-C motif) ligand 19 binding	0.004
1281	GO:2000547	regulation of dendritic cell dendrite assembly	0.004
1282	GO:0002885	positive regulation of hypersensitivity	0.004
1283	GO:0038115	chemokine (C-C motif) ligand 19 signaling pathway	0.004
1284	GO:0097022	lymphocyte migration into lymph node	0.004
1285	GO:0038116	chemokine (C-C motif) ligand 21 signaling pathway	0.004
1286	GO:0033629	negative regulation of cell adhesion mediated by integrin	0.004
1287	GO:0035408	histone H3-T6 phosphorylation	0.004
1288	GO:0035403	histone kinase activity (H3-T6 specific)	0.004
1289	GO:0046621	negative regulation of organ growth	0.004
1290	GO:0042088	T-helper 1 type immune response	0.004
1291	GO:0002903	negative regulation of B cell apoptotic process	0.004
1292	GO:0045651	positive regulation of macrophage differentiation	0.004
1293	GO:0031755	Edg-2 lysophosphatidic acid receptor binding	0.004
1294	GO:0070498	interleukin-1-mediated signaling pathway	0.004
1295	GO:0048312	intracellular distribution of mitochondria	0.004
1296	GO:0042511	positive regulation of tyrosine phosphorylation of Stat1 protein	0.004
1297	GO:0005078	MAP-kinase scaffold activity	0.004
1298	GO:0031659	positive regulation of cyclin-dependent protein serine/threonine kinase activity involved in G1/S transition of mitotic cell cycle	0.004
1299	GO:0032320	positive regulation of GTPase activity	0.004
1300	GO:0045060	negative thymic T cell selection	0.004
1301	GO:0002326	B cell lineage commitment	0.004
1302	GO:0032232	negative regulation of actin filament bundle assembly	0.004
1303	GO:0030949	positive regulation of vascular endothelial growth factor receptor signaling pathway	0.004
1304	GO:0042297	vocal learning	0.004
1305	GO:0014067	negative regulation of phosphatidylinositol 3-kinase signaling	0.004
1306	GO:0008385	IkappaB kinase complex	0.004
1307	GO:0032390	MutLbeta complex	0.004
1308	GO:0005712	chiasma	0.004
1309	GO:0033088	negative regulation of immature T cell proliferation in thymus	0.004
1310	GO:0046330	positive regulation of JNK cascade	0.004
1311	GO:0045088	regulation of innate immune response	0.004
1312	GO:0060463	lung lobe morphogenesis	0.004
1313	GO:0008140	cAMP response element binding protein binding	0.004
1314	GO:0030264	nuclear fragmentation involved in apoptotic nuclear change	0.004
1315	GO:0045838	positive regulation of membrane potential	0.004
1316	GO:0001912	positive regulation of leukocyte mediated cytotoxicity	0.004
1317	GO:0048715	negative regulation of oligodendrocyte differentiation	0.004
1318	GO:0060664	epithelial cell proliferation involved in salivary gland morphogenesis	0.004
1319	GO:0002358	B cell homeostatic proliferation	0.004
1320	GO:0045663	positive regulation of myoblast differentiation	0.004
1321	GO:0005172	vascular endothelial growth factor receptor binding	0.004
1322	GO:0034616	response to laminar fluid shear stress	0.004
1323	GO:0043330	response to exogenous dsRNA	0.004
1324	GO:0070672	response to interleukin-15	0.004
1325	GO:0071559	response to transforming growth factor beta	0.004
1326	GO:0031623	receptor internalization	0.004
1327	GO:0031265	CD95 death-inducing signaling complex	0.004
1328	GO:0070371	ERK1 and ERK2 cascade	0.004
1329	GO:0030877	beta-catenin destruction complex	0.004
1330	GO:0016891	endoribonuclease activity, producing 5'-phosphomonoesters	0.004
1331	GO:0000987	core promoter proximal region sequence-specific DNA binding	0.004
1332	GO:0031065	positive regulation of histone deacetylation	0.004
1333	GO:0046641	positive regulation of alpha-beta T cell proliferation	0.004
1334	GO:0051444	negative regulation of ubiquitin-protein transferase activity	0.004
1335	GO:0016202	regulation of striated muscle tissue development	0.004
1336	GO:0043120	tumor necrosis factor binding	0.004
1337	GO:0030279	negative regulation of ossification	0.004
1338	GO:0051151	negative regulation of smooth muscle cell differentiation	0.004
1339	GO:0060554	necroptotic process	0.004
1340	GO:0006278	RNA-dependent DNA biosynthetic process	0.004
1341	GO:0055094	response to lipoprotein particle	0.004
1342	GO:0033209	tumor necrosis factor-mediated signaling pathway	0.004
1343	GO:0070512	positive regulation of histone H4-K20 methylation	0.004
1344	GO:2000617	positive regulation of histone H3-K9 acetylation	0.004
1345	GO:0048286	lung alveolus development	0.004
1346	GO:2000620	positive regulation of histone H4-K16 acetylation	0.004
1347	GO:0051272	positive regulation of cellular component movement	0.004
1348	GO:0009968	negative regulation of signal transduction	0.004
1349	GO:2000811	negative regulation of anoikis	0.004
1350	GO:0014889	muscle atrophy	0.004
1351	GO:0002467	germinal center formation	0.004
1352	GO:0003340	negative regulation of mesenchymal to epithelial transition involved in metanephros morphogenesis	0.004
1353	GO:0045063	T-helper 1 cell differentiation	0.004
1354	GO:0005085	guanyl-nucleotide exchange factor activity	0.004
1355	GO:0007249	I-kappaB kinase/NF-kappaB signaling	0.004
1356	GO:0010922	positive regulation of phosphatase activity	0.004
1357	GO:0017124	SH3 domain binding	0.004
1358	GO:0060385	axonogenesis involved in innervation	0.004
1359	GO:0060831	smoothened signaling pathway involved in dorsal/ventral neural tube patterning	0.004
1360	GO:0035162	embryonic hemopoiesis	0.004
1361	GO:0060086	circadian temperature homeostasis	0.004
1362	GO:0072053	renal inner medulla development	0.004
1363	GO:0072054	renal outer medulla development	0.004
1364	GO:0070232	regulation of T cell apoptotic process	0.004
1365	GO:0045221	negative regulation of FasL biosynthetic process	0.004
1366	GO:0005088	Ras guanyl-nucleotide exchange factor activity	0.004
1367	GO:0002731	negative regulation of dendritic cell cytokine production	0.004
1368	GO:0032269	negative regulation of cellular protein metabolic process	0.004
1369	GO:0032593	insulin-responsive compartment	0.004
1370	GO:0051534	negative regulation of NFAT protein import into nucleus	0.004
1371	GO:0071499	cellular response to laminar fluid shear stress	0.004
1372	GO:0046834	lipid phosphorylation	0.004
1373	GO:0001727	lipid kinase activity	0.004
1374	GO:0006959	humoral immune response	0.004
1375	GO:0051279	regulation of release of sequestered calcium ion into cytosol	0.004
1376	GO:0035023	regulation of Rho protein signal transduction	0.004
1377	GO:0000115	obsolete regulation of transcription involved in S phase of mitotic cell cycle	0.004
1378	GO:0048536	spleen development	0.004
1379	GO:1900142	negative regulation of oligodendrocyte apoptotic process	0.004
1380	GO:2000533	negative regulation of renal albumin absorption	0.004
1381	GO:0010934	macrophage cytokine production	0.004
1382	GO:1900165	negative regulation of interleukin-6 secretion	0.004
1383	GO:0021757	caudate nucleus development	0.004
1384	GO:0021758	putamen development	0.004
1385	GO:0005624	obsolete membrane fraction	0.004
1386	GO:0051249	regulation of lymphocyte activation	0.004
1387	GO:0008360	regulation of cell shape	0.004
1388	GO:0031575	mitotic cell cycle checkpoint	0.004
1389	GO:0010485	H4 histone acetyltransferase activity	0.004
1390	GO:0019221	cytokine-mediated signaling pathway	0.004
1391	GO:0051428	peptide hormone receptor binding	0.004
1392	GO:0019987	obsolete negative regulation of anti-apoptosis	0.004
1393	GO:0002875	negative regulation of chronic inflammatory response to antigenic stimulus	0.004
1394	GO:0005141	interleukin-10 receptor binding	0.004
1395	GO:0030886	negative regulation of myeloid dendritic cell activation	0.004
1396	GO:0045355	negative regulation of interferon-alpha biosynthetic process	0.004
1397	GO:0033026	negative regulation of mast cell apoptotic process	0.004
1398	GO:0060011	Sertoli cell proliferation	0.004
1399	GO:0060019	radial glial cell differentiation	0.004
1400	GO:0001568	blood vessel development	0.004
1401	GO:0010465	nerve growth factor receptor activity	0.004
1402	GO:0035355	Toll-like receptor 2-Toll-like receptor 6 protein complex	0.004
1403	GO:0071726	cellular response to diacyl bacterial lipopeptide	0.004
1404	GO:0042496	detection of diacyl bacterial lipopeptide	0.004
1405	GO:0042498	diacyl lipopeptide binding	0.004
1406	GO:0031642	negative regulation of myelination	0.004
1407	GO:0070375	ERK5 cascade	0.004
1408	GO:0010518	positive regulation of phospholipase activity	0.004
1409	GO:0043535	regulation of blood vessel endothelial cell migration	0.004
1410	GO:0005173	stem cell factor receptor binding	0.004
1411	GO:0015026	coreceptor activity	0.004
1412	GO:0061146	Peyer's patch morphogenesis	0.004
1413	GO:0097021	lymphocyte migration into lymphoid organs	0.004
1414	GO:0039530	MDA-5 signaling pathway	0.004
1415	GO:0032794	GTPase activating protein binding	0.004
1416	GO:0010765	positive regulation of sodium ion transport	0.004
1417	GO:2000352	negative regulation of endothelial cell apoptotic process	0.004
1418	GO:0072203	cell proliferation involved in metanephros development	0.004
1419	GO:0061005	cell differentiation involved in kidney development	0.004
1420	GO:0021997	neural plate axis specification	0.004
1421	GO:0002839	positive regulation of immune response to tumor cell	0.004
1422	GO:0009411	response to UV	0.004
1423	GO:0051665	membrane raft localization	0.004
1424	GO:0085029	extracellular matrix assembly	0.004
1425	GO:0000133	polarisome	0.004
1426	GO:0097039	protein linear polyubiquitination	0.004
1427	GO:0071797	LUBAC complex	0.004
1428	GO:0048598	embryonic morphogenesis	0.004
1429	GO:0038061	NIK/NF-kappaB signaling	0.004
1430	GO:0007182	common-partner SMAD protein phosphorylation	0.004
1431	GO:0060021	palate development	0.004
1432	GO:0002752	cell surface pattern recognition receptor signaling pathway	0.004
1433	GO:0005129	granulocyte macrophage colony-stimulating factor receptor binding	0.004
1434	GO:0000902	cell morphogenesis	0.004
1435	GO:0043009	chordate embryonic development	0.004
1436	GO:0060748	tertiary branching involved in mammary gland duct morphogenesis	0.004
1437	GO:0019211	phosphatase activator activity	0.004
1438	GO:0021762	substantia nigra development	0.004
1439	GO:0007498	mesoderm development	0.004
1440	hsa05323	Rheumatoid arthritis	0.004
1441	GO:0043616	keratinocyte proliferation	0.004
1442	GO:0046685	response to arsenic-containing substance	0.004
1443	GO:0003413	chondrocyte differentiation involved in endochondral bone morphogenesis	0.004
1444	GO:0097193	intrinsic apoptotic signaling pathway	0.004
1445	GO:0048485	sympathetic nervous system development	0.004
1446	GO:0060916	mesenchymal cell proliferation involved in lung development	0.004
1447	GO:0060252	positive regulation of glial cell proliferation	0.004
1448	GO:0072537	fibroblast activation	0.004
1449	GO:0010469	regulation of receptor activity	0.004
1450	GO:0045722	positive regulation of gluconeogenesis	0.004
1451	GO:0072676	lymphocyte migration	0.004
1452	GO:0070410	co-SMAD binding	0.004
1453	GO:0032148	activation of protein kinase B activity	0.004
1454	GO:0031093	platelet alpha granule lumen	0.004
1455	GO:0002634	regulation of germinal center formation	0.004
1456	GO:0050655	dermatan sulfate proteoglycan metabolic process	0.004
1457	GO:0050861	positive regulation of B cell receptor signaling pathway	0.004
1458	GO:0061030	epithelial cell differentiation involved in mammary gland alveolus development	0.004
1459	GO:0002521	leukocyte differentiation	0.004
1460	GO:0001944	vasculature development	0.004
1461	GO:0008078	mesodermal cell migration	0.004
1462	GO:0035276	ethanol binding	0.004
1463	GO:0006979	response to oxidative stress	0.004
1464	GO:0031398	positive regulation of protein ubiquitination	0.004
1465	GO:0050688	regulation of defense response to virus	0.004
1466	GO:0007406	negative regulation of neuroblast proliferation	0.004
1467	GO:0031334	positive regulation of protein complex assembly	0.004
1468	GO:0006417	regulation of translation	0.004
1469	GO:0042104	positive regulation of activated T cell proliferation	0.004
1470	GO:0008083	growth factor activity	0.004
1471	GO:0051280	negative regulation of release of sequestered calcium ion into cytosol	0.004
1472	GO:0060302	negative regulation of cytokine activity	0.004
1473	GO:0090193	positive regulation of glomerulus development	0.004
1474	GO:2000313	regulation of fibroblast growth factor receptor signaling pathway involved in neural plate anterior/posterior pattern formation	0.004
1475	GO:0060825	fibroblast growth factor receptor signaling pathway involved in neural plate anterior/posterior pattern formation	0.004
1476	GO:0044429	mitochondrial part	0.004
1477	GO:0048639	positive regulation of developmental growth	0.004
1478	GO:0046732	active induction of host immune response by virus	0.004
1479	GO:0001030	RNA polymerase III type 1 promoter DNA binding	0.004
1480	GO:0001032	RNA polymerase III type 3 promoter DNA binding	0.004
1481	GO:0001031	RNA polymerase III type 2 promoter DNA binding	0.004
1482	GO:0071222	cellular response to lipopolysaccharide	0.004
1483	GO:0042102	positive regulation of T cell proliferation	0.004
1484	GO:0003289	atrial septum primum morphogenesis	0.004
1485	GO:0071322	cellular response to carbohydrate stimulus	0.004
1486	GO:0090394	negative regulation of excitatory postsynaptic potential	0.004
1487	GO:0051930	regulation of sensory perception of pain	0.004
1488	GO:0005119	smoothened binding	0.004
1489	GO:0016445	somatic diversification of immunoglobulins	0.004
1490	GO:2000525	positive regulation of T cell costimulation	0.004
1491	GO:0050829	defense response to Gram-negative bacterium	0.004
1492	GO:0048273	mitogen-activated protein kinase p38 binding	0.004
1493	GO:0005133	interferon-gamma receptor binding	0.004
1494	GO:0006924	activation-induced cell death of T cells	0.004
1495	GO:0051898	negative regulation of protein kinase B signaling	0.004
1496	GO:0003073	regulation of systemic arterial blood pressure	0.004
1497	GO:0006651	diacylglycerol biosynthetic process	0.004
1498	GO:0002076	osteoblast development	0.004
1499	GO:0071307	cellular response to vitamin K	0.004
1500	GO:0010740	positive regulation of intracellular signal transduction	0.004
1501	GO:0048839	inner ear development	0.004
1502	GO:0070613	regulation of protein processing	0.004
1503	GO:0021955	central nervous system neuron axonogenesis	0.004
1504	GO:0051252	regulation of RNA metabolic process	0.004
1505	GO:0060670	branching involved in labyrinthine layer morphogenesis	0.004
1506	GO:0043518	negative regulation of DNA damage response, signal transduction by p53 class mediator	0.004
1507	GO:0002011	morphogenesis of an epithelial sheet	0.004
1508	GO:0030274	LIM domain binding	0.004
1509	GO:0048074	negative regulation of eye pigmentation	0.004
1510	GO:0060220	camera-type eye photoreceptor cell fate commitment	0.004
1511	GO:0007092	positive regulation of ubiquitin protein ligase activity	0.004
1512	GO:0048568	embryonic organ development	0.004
1513	GO:0001554	luteolysis	0.004
1514	GO:0070836	caveola assembly	0.004
1515	GO:0030275	LRR domain binding	0.004
1516	GO:0009409	response to cold	0.004
1517	GO:0044337	canonical Wnt signaling pathway involved in positive regulation of apoptotic process	0.004
1518	GO:0060078	regulation of postsynaptic membrane potential	0.004
1519	GO:0050775	positive regulation of dendrite morphogenesis	0.004
1520	GO:0045621	positive regulation of lymphocyte differentiation	0.004
1521	GO:0071404	cellular response to low-density lipoprotein particle stimulus	0.004
1522	GO:0030704	vitelline membrane formation	0.004
1523	GO:0031571	mitotic G1 DNA damage checkpoint	0.004
1524	GO:0004517	nitric-oxide synthase activity	0.004
1525	GO:0030296	protein tyrosine kinase activator activity	0.004
1526	GO:0008481	sphinganine kinase activity	0.004
1527	GO:0017050	D-erythro-sphingosine kinase activity	0.004
1528	GO:0060770	negative regulation of epithelial cell proliferation involved in prostate gland development	0.004
1529	GO:0051492	regulation of stress fiber assembly	0.004
1530	GO:0033133	positive regulation of glucokinase activity	0.004
1531	GO:0032863	activation of GTPase activity	0.004
1532	GO:0051318	G1 phase	0.004
1533	GO:0060545	positive regulation of necroptotic process	0.004
1534	GO:0070926	regulation of ATP:ADP antiporter activity	0.004
1535	GO:0010757	negative regulation of plasminogen activation	0.004
1536	GO:0048260	positive regulation of receptor-mediated endocytosis	0.004
1537	GO:0001707	mesoderm formation	0.004
1538	GO:0021766	hippocampus development	0.004
1539	GO:0021545	cranial nerve development	0.004
1540	GO:0032740	positive regulation of interleukin-17 production	0.004
1541	GO:0046426	negative regulation of JAK-STAT cascade	0.004
1542	GO:0060312	regulation of blood vessel remodeling	0.004
1543	GO:0060335	positive regulation of interferon-gamma-mediated signaling pathway	0.004
1544	GO:0045672	positive regulation of osteoclast differentiation	0.004
1545	GO:0045569	TRAIL binding	0.004
1546	GO:0072345	NAADP-sensitive calcium-release channel activity	0.004
1547	GO:0034116	positive regulation of heterotypic cell-cell adhesion	0.004
1548	GO:0001756	somitogenesis	0.004
1549	GO:0071393	cellular response to progesterone stimulus	0.004
1550	GO:0021889	olfactory bulb interneuron differentiation	0.004
1551	GO:0032027	myosin light chain binding	0.004
1552	GO:0090085	regulation of protein deubiquitination	0.004
1553	GO:2000273	positive regulation of receptor activity	0.004
1554	GO:0010484	H3 histone acetyltransferase activity	0.004
1555	GO:0060665	regulation of branching involved in salivary gland morphogenesis by mesenchymal-epithelial signaling	0.004
1556	GO:0031134	sister chromatid biorientation	0.004
1557	GO:0004705	JUN kinase activity	0.004
1558	GO:0014902	myotube differentiation	0.004
1559	GO:0035924	cellular response to vascular endothelial growth factor stimulus	0.004
1560	GO:0090141	positive regulation of mitochondrial fission	0.004
1561	GO:0070857	regulation of bile acid biosynthetic process	0.004
1562	GO:0045743	positive regulation of fibroblast growth factor receptor signaling pathway	0.004
1563	GO:0060399	positive regulation of growth hormone receptor signaling pathway	0.004
1564	GO:0005924	cell-substrate adherens junction	0.004
1565	GO:0071930	negative regulation of transcription involved in G1/S transition of mitotic cell cycle	0.004
1566	GO:0046716	muscle cell cellular homeostasis	0.004
1567	GO:0070102	interleukin-6-mediated signaling pathway	0.004
1568	GO:0030513	positive regulation of BMP signaling pathway	0.004
1569	GO:0046578	regulation of Ras protein signal transduction	0.004
1570	GO:0014028	notochord formation	0.004
1571	GO:0030291	protein serine/threonine kinase inhibitor activity	0.004
1572	GO:0060687	regulation of branching involved in prostate gland morphogenesis	0.004
1573	GO:0051348	negative regulation of transferase activity	0.004
1574	GO:0006309	apoptotic DNA fragmentation	0.004
1575	GO:0021940	positive regulation of cerebellar granule cell precursor proliferation	0.004
1576	GO:0043129	surfactant homeostasis	0.004
1577	GO:0070318	positive regulation of G0 to G1 transition	0.004
1578	GO:0031681	G-protein beta-subunit binding	0.004
1579	GO:0007266	Rho protein signal transduction	0.004
1580	GO:0034261	negative regulation of GTPase activity	0.004
1581	GO:0001838	embryonic epithelial tube formation	0.004
1582	GO:0010875	positive regulation of cholesterol efflux	0.004
1583	GO:0072091	regulation of stem cell proliferation	0.004
1584	GO:0019902	phosphatase binding	0.004
1585	GO:0034124	regulation of MyD88-dependent toll-like receptor signaling pathway	0.004
1586	GO:0042092	type 2 immune response	0.004
1587	GO:0010544	negative regulation of platelet activation	0.004
1588	GO:0032288	myelin assembly	0.004
1589	GO:0003338	metanephros morphogenesis	0.004
1590	GO:0060741	prostate gland stromal morphogenesis	0.004
1591	GO:0001708	cell fate specification	0.004
1592	GO:0030511	positive regulation of transforming growth factor beta receptor signaling pathway	0.004
1593	GO:0034394	protein localization to cell surface	0.004
1594	GO:0030224	monocyte differentiation	0.004
1595	GO:0035457	cellular response to interferon-alpha	0.004
1596	GO:0072017	distal tubule development	0.004
1597	GO:0048388	endosomal lumen acidification	0.004
1598	GO:0016913	follicle-stimulating hormone activity	0.004
1599	GO:0016604	nuclear body	0.004
1600	GO:0010226	response to lithium ion	0.004
1601	GO:0019730	antimicrobial humoral response	0.004
1602	GO:0032996	Bcl3-Bcl10 complex	0.004
1603	GO:0050691	regulation of defense response to virus by host	0.004
1604	GO:0046600	negative regulation of centriole replication	0.004
1605	GO:0033205	cytokinesis	0.004
1606	GO:0001046	core promoter sequence-specific DNA binding	0.004
1607	GO:0045666	positive regulation of neuron differentiation	0.004
1608	GO:0072661	protein targeting to plasma membrane	0.004
1609	GO:2000098	negative regulation of smooth muscle cell-matrix adhesion	0.004
1610	GO:0031346	positive regulation of cell projection organization	0.004
1611	GO:0060393	regulation of pathway-restricted SMAD protein phosphorylation	0.004
1612	GO:0034105	positive regulation of tissue remodeling	0.004
1613	GO:0030177	positive regulation of Wnt signaling pathway	0.004
1614	GO:0010165	response to X-ray	0.004
1615	GO:0050920	regulation of chemotaxis	0.004
1616	GO:0005146	leukemia inhibitory factor receptor binding	0.004
1617	GO:0044351	macropinocytosis	0.004
1618	GO:2001054	negative regulation of mesenchymal cell apoptotic process	0.004
1619	GO:0090399	replicative senescence	0.004
1620	GO:0072190	ureter urothelium development	0.004
1621	GO:0061180	mammary gland epithelium development	0.004
1622	GO:0070306	lens fiber cell differentiation	0.004
1623	GO:0007346	regulation of mitotic cell cycle	0.004
1624	GO:0035729	cellular response to hepatocyte growth factor stimulus	0.004
1625	GO:0007159	leukocyte cell-cell adhesion	0.004
1626	GO:2000114	regulation of establishment of cell polarity	0.004
1627	GO:0035173	histone kinase activity	0.004
1628	GO:0051150	regulation of smooth muscle cell differentiation	0.004
1629	GO:0043062	extracellular structure organization	0.004
1630	GO:0033993	response to lipid	0.004
1631	GO:0043149	stress fiber assembly	0.004
1632	GO:0071560	cellular response to transforming growth factor beta stimulus	0.004
1633	GO:0045216	cell-cell junction organization	0.004
1634	GO:0014842	regulation of skeletal muscle satellite cell proliferation	0.004
1635	GO:0010389	regulation of G2/M transition of mitotic cell cycle	0.004
1636	GO:0043539	protein serine/threonine kinase activator activity	0.004
1637	GO:0010046	response to mycotoxin	0.004
1638	GO:0045199	maintenance of epithelial cell apical/basal polarity	0.004
1639	GO:0050847	progesterone receptor signaling pathway	0.004
1640	GO:0048859	formation of anatomical boundary	0.004
1641	GO:0008625	extrinsic apoptotic signaling pathway via death domain receptors	0.004
1642	GO:0032318	regulation of GTPase activity	0.004
1643	GO:0045793	positive regulation of cell size	0.004
1644	GO:0042153	obsolete RPTP-like protein binding	0.004
1645	GO:0001300	chronological cell aging	0.004
1646	GO:0031293	membrane protein intracellular domain proteolysis	0.004
1647	GO:0004900	erythropoietin receptor activity	0.004
1648	GO:0038162	erythropoietin-mediated signaling pathway	0.004
1649	GO:0031116	positive regulation of microtubule polymerization	0.004
1650	GO:0006897	endocytosis	0.004
1651	GO:0045519	interleukin-23 receptor binding	0.004
1652	GO:0055026	negative regulation of cardiac muscle tissue development	0.004
1653	GO:0038145	macrophage colony-stimulating factor signaling pathway	0.004
1654	GO:0005011	macrophage colony-stimulating factor receptor activity	0.004
1655	GO:0050715	positive regulation of cytokine secretion	0.004
1656	GO:0043085	positive regulation of catalytic activity	0.004
1657	GO:0002821	positive regulation of adaptive immune response	0.004
1658	GO:0004392	heme oxygenase (decyclizing) activity	0.004
1659	GO:0006788	heme oxidation	0.004
1660	GO:0010508	positive regulation of autophagy	0.004
1661	GO:0090136	epithelial cell-cell adhesion	0.004
1662	GO:0006929	substrate-dependent cell migration	0.004
1663	GO:2000773	negative regulation of cellular senescence	0.004
1664	GO:0002721	regulation of B cell cytokine production	0.004
1665	GO:0030674	protein binding, bridging	0.004
1666	GO:0032000	positive regulation of fatty acid beta-oxidation	0.004
1667	GO:0070372	regulation of ERK1 and ERK2 cascade	0.004
1668	GO:0007184	SMAD protein import into nucleus	0.004
1669	GO:0021532	neural tube patterning	0.004
1670	GO:0030038	contractile actin filament bundle assembly	0.004
1671	GO:0051023	regulation of immunoglobulin secretion	0.004
1672	GO:0030216	keratinocyte differentiation	0.004
1673	GO:0051414	response to cortisol	0.004
1674	GO:0035385	Roundabout signaling pathway	0.004
1675	GO:0070699	type II activin receptor binding	0.004
1676	GO:0016239	positive regulation of macroautophagy	0.004
1677	GO:0004723	calcium-dependent protein serine/threonine phosphatase activity	0.004
1678	GO:0043555	regulation of translation in response to stress	0.004
1679	GO:0070947	neutrophil mediated killing of fungus	0.004
1680	GO:0071889	14-3-3 protein binding	0.004
1681	GO:0006927	obsolete transformed cell apoptotic process	0.004
1682	GO:2000570	positive regulation of T-helper 2 cell activation	0.004
1683	GO:0032092	positive regulation of protein binding	0.004
1684	GO:0060027	convergent extension involved in gastrulation	0.004
1685	GO:0071375	cellular response to peptide hormone stimulus	0.004
1686	GO:2000249	regulation of actin cytoskeleton reorganization	0.004
1687	GO:0001823	mesonephros development	0.004
1688	GO:0010694	positive regulation of alkaline phosphatase activity	0.004
1689	GO:0002331	pre-B cell allelic exclusion	0.004
1690	GO:0030539	male genitalia development	0.004
1691	GO:0060587	regulation of lipoprotein lipid oxidation	0.004
1692	GO:0071298	cellular response to L-ascorbic acid	0.004
1693	GO:0051956	negative regulation of amino acid transport	0.004
1694	GO:0033686	positive regulation of luteinizing hormone secretion	0.004
1695	GO:0060501	positive regulation of epithelial cell proliferation involved in lung morphogenesis	0.004
1696	GO:0042640	anagen	0.004
1697	GO:0060768	regulation of epithelial cell proliferation involved in prostate gland development	0.004
1698	GO:0009617	response to bacterium	0.004
1699	GO:0097156	fasciculation of motor neuron axon	0.004
1700	GO:0097155	fasciculation of sensory neuron axon	0.004
1701	GO:0016101	diterpenoid metabolic process	0.004
1702	GO:0032045	guanyl-nucleotide exchange factor complex	0.004
1703	GO:0033137	negative regulation of peptidyl-serine phosphorylation	0.004
1704	GO:0070976	TIR domain binding	0.004
1705	GO:0005121	Toll binding	0.004
1706	GO:0007566	embryo implantation	0.004
1707	GO:0060437	lung growth	0.004
1708	GO:0002246	wound healing involved in inflammatory response	0.004
1709	GO:0043183	vascular endothelial growth factor receptor 1 binding	0.004
1710	GO:0031396	regulation of protein ubiquitination	0.004
1711	GO:0070431	nucleotide-binding oligomerization domain containing 2 signaling pathway	0.004
1712	GO:0031558	obsolete induction of apoptosis in response to chemical stimulus	0.004
1713	GO:0002042	cell migration involved in sprouting angiogenesis	0.004
1714	GO:0051216	cartilage development	0.004
1715	GO:0048853	forebrain morphogenesis	0.004
1716	GO:0042986	positive regulation of amyloid precursor protein biosynthetic process	0.004
1717	GO:0061153	trachea gland development	0.004
1718	GO:0050897	cobalt ion binding	0.004
1719	GO:0043537	negative regulation of blood vessel endothelial cell migration	0.004
1720	GO:0010828	positive regulation of glucose transport	0.004
1721	GO:0097190	apoptotic signaling pathway	0.004
1722	GO:0031932	TORC2 complex	0.004
1723	GO:0072428	signal transduction involved in intra-S DNA damage checkpoint	0.004
1724	GO:0007044	cell-substrate junction assembly	0.004
1725	GO:0000983	transcription factor activity, RNA polymerase II core promoter sequence-specific	0.004
1726	GO:0072610	interleukin-12 secretion	0.004
1727	GO:0002408	myeloid dendritic cell chemotaxis	0.004
1728	GO:0032722	positive regulation of chemokine production	0.004
1729	GO:0032332	positive regulation of chondrocyte differentiation	0.004
1730	GO:0034605	cellular response to heat	0.004
1731	GO:0000982	transcription factor activity, RNA polymerase II core promoter proximal region sequence-specific binding	0.004
1732	GO:0042495	detection of triacyl bacterial lipopeptide	0.004
1733	GO:0071727	cellular response to triacyl bacterial lipopeptide	0.004
1734	GO:0035354	Toll-like receptor 1-Toll-like receptor 2 protein complex	0.004
1735	GO:0060769	positive regulation of epithelial cell proliferation involved in prostate gland development	0.004
1736	GO:0004879	RNA polymerase II transcription factor activity, ligand-activated sequence-specific DNA binding	0.004
1737	GO:0007202	activation of phospholipase C activity	0.004
1738	GO:0061324	canonical Wnt signaling pathway involved in positive regulation of cardiac outflow tract cell proliferation	0.004
1739	GO:0021847	ventricular zone neuroblast division	0.004
1740	GO:0021769	orbitofrontal cortex development	0.004
1741	GO:0035607	fibroblast growth factor receptor signaling pathway involved in orbitofrontal cortex development	0.004
1742	GO:2000480	negative regulation of cAMP-dependent protein kinase activity	0.004
1743	GO:0035358	regulation of peroxisome proliferator activated receptor signaling pathway	0.004
1744	GO:0034979	NAD-dependent protein deacetylase activity	0.004
1745	GO:0031393	negative regulation of prostaglandin biosynthetic process	0.004
1746	GO:2000655	negative regulation of cellular response to testosterone stimulus	0.004
1747	GO:0006343	establishment of chromatin silencing	0.004
1748	GO:2000757	negative regulation of peptidyl-lysine acetylation	0.004
1749	GO:0034391	regulation of smooth muscle cell apoptotic process	0.004
1750	GO:0010735	positive regulation of transcription via serum response element binding	0.004
1751	GO:0010736	serum response element binding	0.004
1752	GO:0033591	response to L-ascorbic acid	0.004
1753	GO:0001505	regulation of neurotransmitter levels	0.004
1754	GO:0043967	histone H4 acetylation	0.004
1755	GO:0048733	sebaceous gland development	0.004
1756	GO:0015891	siderophore transport	0.004
1757	GO:0002437	inflammatory response to antigenic stimulus	0.004
1758	GO:0090265	positive regulation of immune complex clearance by monocytes and macrophages	0.004
1759	GO:0031727	CCR2 chemokine receptor binding	0.004
1760	GO:0072033	renal vesicle formation	0.004
1761	GO:0009966	regulation of signal transduction	0.004
1762	GO:0031665	negative regulation of lipopolysaccharide-mediated signaling pathway	0.004
1763	GO:0005427	proton-dependent oligopeptide secondary active transmembrane transporter activity	0.004
1764	GO:0048014	Tie signaling pathway	0.004
1765	GO:0001553	luteinization	0.004
1766	GO:0051926	negative regulation of calcium ion transport	0.004
1767	GO:0001968	fibronectin binding	0.004
1768	GO:0060444	branching involved in mammary gland duct morphogenesis	0.004
1769	GO:0050872	white fat cell differentiation	0.004
1770	GO:0043217	myelin maintenance	0.004
1771	GO:0070491	repressing transcription factor binding	0.004
1772	GO:0002904	positive regulation of B cell apoptotic process	0.004
1773	GO:0043277	apoptotic cell clearance	0.004
1774	GO:0043296	apical junction complex	0.004
1775	GO:0048406	nerve growth factor binding	0.004
1776	GO:0000320	re-entry into mitotic cell cycle	0.004
1777	GO:0003692	left-handed Z-DNA binding	0.004
1778	GO:0019826	oxygen sensor activity	0.004
1779	GO:0090279	regulation of calcium ion import	0.004
1780	GO:0003323	type B pancreatic cell development	0.004
1781	GO:0071312	cellular response to alkaloid	0.004
1782	hsa05340	Primary immunodeficiency	0.004
1783	GO:0050928	negative regulation of positive chemotaxis	0.004
1784	GO:0034742	beta-catenin destruction complex	0.004
1785	GO:0055096	low-density lipoprotein particle mediated signaling	0.004
1786	GO:0070059	intrinsic apoptotic signaling pathway in response to endoplasmic reticulum stress	0.004
1787	GO:0071398	cellular response to fatty acid	0.004
1788	GO:2000467	positive regulation of glycogen (starch) synthase activity	0.004
1789	GO:0010803	regulation of tumor necrosis factor-mediated signaling pathway	0.004
1790	GO:0045351	type I interferon biosynthetic process	0.004
1791	GO:0050851	antigen receptor-mediated signaling pathway	0.004
1792	GO:0033688	regulation of osteoblast proliferation	0.004
1793	GO:0051881	regulation of mitochondrial membrane potential	0.004
1794	GO:0031103	axon regeneration	0.004
1795	GO:0002553	histamine secretion by mast cell	0.004
1796	GO:0023021	termination of signal transduction	0.004
1797	GO:0045091	regulation of single stranded viral RNA replication via double stranded DNA intermediate	0.004
1798	GO:0034465	response to carbon monoxide	0.004
1799	GO:0048294	negative regulation of isotype switching to IgE isotypes	0.004
1800	GO:0038083	peptidyl-tyrosine autophosphorylation	0.004
1801	GO:0032651	regulation of interleukin-1 beta production	0.004
1802	GO:0021747	cochlear nucleus development	0.004
1803	GO:0032747	positive regulation of interleukin-23 production	0.004
1804	GO:0043547	positive regulation of GTPase activity	0.004
1805	GO:0042476	odontogenesis	0.004
1806	GO:0045348	positive regulation of MHC class II biosynthetic process	0.004
1807	GO:0035094	response to nicotine	0.004
1808	GO:0070091	glucagon secretion	0.004
1809	GO:0048145	regulation of fibroblast proliferation	0.004
1810	GO:0060319	primitive erythrocyte differentiation	0.004
1811	GO:0045662	negative regulation of myoblast differentiation	0.004
1812	GO:0048711	positive regulation of astrocyte differentiation	0.004
1813	GO:0051425	PTB domain binding	0.004
1814	GO:0002360	T cell lineage commitment	0.004
1815	GO:0001763	morphogenesis of a branching structure	0.004
1816	GO:0005131	growth hormone receptor binding	0.004
1817	GO:0035988	chondrocyte proliferation	0.004
1818	GO:0060426	lung vasculature development	0.004
1819	GO:0005902	microvillus	0.004
1820	GO:0030198	extracellular matrix organization	0.004
1821	GO:0031589	cell-substrate adhesion	0.004
1822	GO:0031000	response to caffeine	0.004
1823	GO:0090050	positive regulation of cell migration involved in sprouting angiogenesis	0.004
1824	GO:0040037	negative regulation of fibroblast growth factor receptor signaling pathway	0.004
1825	GO:0045076	regulation of interleukin-2 biosynthetic process	0.004
1826	GO:0045542	positive regulation of cholesterol biosynthetic process	0.004
1827	GO:0072001	renal system development	0.004
1828	GO:0010040	response to iron(II) ion	0.004
1829	GO:0060761	negative regulation of response to cytokine stimulus	0.004
1830	GO:0005021	vascular endothelial growth factor-activated receptor activity	0.004
1831	GO:0070946	neutrophil mediated killing of gram-positive bacterium	0.004
1832	GO:0045715	negative regulation of low-density lipoprotein particle receptor biosynthetic process	0.004
1833	GO:0010742	macrophage derived foam cell differentiation	0.004
1834	GO:0034713	type I transforming growth factor beta receptor binding	0.004
1835	GO:0035912	dorsal aorta morphogenesis	0.004
1836	GO:0072563	endothelial microparticle	0.004
1837	GO:0046427	positive regulation of JAK-STAT cascade	0.004
1838	GO:0048714	positive regulation of oligodendrocyte differentiation	0.004
1839	GO:0005102	receptor binding	0.004
1840	GO:0045987	positive regulation of smooth muscle contraction	0.004
1841	GO:0050904	diapedesis	0.004
1842	GO:0010157	response to chlorate	0.004
1843	GO:0071866	negative regulation of apoptotic process in bone marrow	0.004
1844	GO:0071895	odontoblast differentiation	0.004
1845	GO:0043011	myeloid dendritic cell differentiation	0.004
1846	GO:0005741	mitochondrial outer membrane	0.004
1847	GO:0042789	mRNA transcription from RNA polymerase II promoter	0.004
1848	GO:0001957	intramembranous ossification	0.004
1849	GO:0016082	synaptic vesicle priming	0.004
1850	GO:0032507	maintenance of protein location in cell	0.004
1851	GO:0001783	B cell apoptotic process	0.004
1852	GO:0097028	dendritic cell differentiation	0.004
1853	GO:0048709	oligodendrocyte differentiation	0.004
1854	GO:0032925	regulation of activin receptor signaling pathway	0.004
1855	GO:0016358	dendrite development	0.004
1856	GO:0038001	paracrine signaling	0.004
1857	GO:0021542	dentate gyrus development	0.004
1858	GO:0005128	erythropoietin receptor binding	0.004
1859	GO:0032413	negative regulation of ion transmembrane transporter activity	0.004
1860	GO:0007162	negative regulation of cell adhesion	0.004
1861	GO:0021983	pituitary gland development	0.004
1862	GO:0030332	cyclin binding	0.004
1863	GO:0035035	histone acetyltransferase binding	0.004
1864	GO:0007409	axonogenesis	0.004
1865	GO:0032009	early phagosome	0.004
1866	GO:0019217	regulation of fatty acid metabolic process	0.004
1867	GO:0034349	glial cell apoptotic process	0.004
1868	GO:0040009	regulation of growth rate	0.004
1869	GO:0060441	epithelial tube branching involved in lung morphogenesis	0.004
1870	GO:0002407	dendritic cell chemotaxis	0.004
1871	GO:0001865	NK T cell differentiation	0.004
1872	GO:0032633	interleukin-4 production	0.004
1873	GO:0060340	positive regulation of type I interferon-mediated signaling pathway	0.004
1874	GO:0014031	mesenchymal cell development	0.004
1875	GO:2000484	positive regulation of interleukin-8 secretion	0.004
1876	GO:0008584	male gonad development	0.004
1877	GO:0006670	sphingosine metabolic process	0.004
1878	GO:0002741	positive regulation of cytokine secretion involved in immune response	0.004
1879	GO:0001843	neural tube closure	0.004
1880	GO:0031998	regulation of fatty acid beta-oxidation	0.004
1881	GO:0032731	positive regulation of interleukin-1 beta production	0.004
1882	GO:0005610	laminin-5 complex	0.004
1883	GO:0046888	negative regulation of hormone secretion	0.004
1884	GO:0050850	positive regulation of calcium-mediated signaling	0.004
1885	GO:0042733	embryonic digit morphogenesis	0.004
1886	GO:0042977	activation of JAK2 kinase activity	0.004
1887	GO:0032958	inositol phosphate biosynthetic process	0.004
1888	GO:0048840	otolith development	0.004
1889	GO:0043179	rhythmic excitation	0.004
1890	GO:0071158	positive regulation of cell cycle arrest	0.004
1891	GO:0001839	neural plate morphogenesis	0.004
1892	GO:0032873	negative regulation of stress-activated MAPK cascade	0.004
1893	GO:0000975	regulatory region DNA binding	0.004
1894	GO:0021954	central nervous system neuron development	0.004
1895	GO:0035855	megakaryocyte development	0.004
1896	GO:0030425	dendrite	0.004
1897	GO:0005769	early endosome	0.004
1898	GO:0071848	positive regulation of ERK1 and ERK2 cascade via TNFSF11-mediated signaling	0.004
1899	GO:0071847	TNFSF11-mediated signaling pathway	0.004
1900	GO:0071812	positive regulation of fever generation by positive regulation of prostaglandin secretion	0.004
1901	GO:0061053	somite development	0.004
1902	GO:0060523	prostate epithelial cord elongation	0.004
1903	GO:0090291	negative regulation of osteoclast proliferation	0.004
1904	GO:0071474	cellular hyperosmotic response	0.004
1905	GO:0043589	skin morphogenesis	0.004
1906	GO:0045358	negative regulation of interferon-beta biosynthetic process	0.004
1907	GO:0043697	cell dedifferentiation	0.004
1908	GO:0048478	replication fork protection	0.004
1909	GO:0072362	regulation of glycolytic process by negative regulation of transcription from RNA polymerase II promoter	0.004
1910	GO:2000191	regulation of fatty acid transport	0.004
1911	GO:0034405	response to fluid shear stress	0.004
1912	GO:0070212	protein poly-ADP-ribosylation	0.004
1913	GO:0048599	oocyte development	0.004
1914	GO:0002032	desensitization of G-protein coupled receptor protein signaling pathway by arrestin	0.004
1915	GO:0010623	programmed cell death involved in cell development	0.004
1916	GO:2000270	negative regulation of fibroblast apoptotic process	0.004
1917	GO:0003714	transcription corepressor activity	0.004
1918	GO:0070447	positive regulation of oligodendrocyte progenitor proliferation	0.004
1919	GO:0060782	regulation of mesenchymal cell proliferation involved in prostate gland development	0.004
1920	GO:0060516	primary prostatic bud elongation	0.004
1921	GO:0046534	positive regulation of photoreceptor cell differentiation	0.004
1922	GO:0014858	positive regulation of skeletal muscle cell proliferation	0.004
1923	GO:0060459	left lung development	0.004
1924	GO:2000357	negative regulation of kidney smooth muscle cell differentiation	0.004
1925	GO:0043369	CD4-positive or CD8-positive, alpha-beta T cell lineage commitment	0.004
1926	GO:0080125	multicellular structure septum development	0.004
1927	GO:0007502	digestive tract mesoderm development	0.004
1928	GO:0061189	positive regulation of sclerotome development	0.004
1929	GO:2000358	positive regulation of kidney smooth muscle cell differentiation	0.004
1930	GO:0060783	mesenchymal smoothened signaling pathway involved in prostate gland development	0.004
1931	GO:0060458	right lung development	0.004
1932	GO:2000063	positive regulation of ureter smooth muscle cell differentiation	0.004
1933	GO:1900175	regulation of nodal signaling pathway involved in determination of lateral mesoderm left/right asymmetry	0.004
1934	GO:2000062	negative regulation of ureter smooth muscle cell differentiation	0.004
1935	GO:2000466	negative regulation of glycogen (starch) synthase activity	0.004
1936	GO:0000255	allantoin metabolic process	0.004
1937	GO:0060065	uterus development	0.004
1938	GO:0071062	alphav-beta3 integrin-vitronectin complex	0.004
1939	GO:0019722	calcium-mediated signaling	0.004
1940	GO:0090068	positive regulation of cell cycle process	0.004
1941	GO:0004197	cysteine-type endopeptidase activity	0.004
1942	GO:0046671	negative regulation of retinal cell programmed cell death	0.004
1943	GO:0035020	regulation of Rac protein signal transduction	0.004
1944	GO:0006948	induction by virus of host cell-cell fusion	0.004
1945	GO:0045234	protein palmitoleylation	0.004
1946	GO:0048608	reproductive structure development	0.004
1947	GO:0051443	positive regulation of ubiquitin-protein transferase activity	0.004
1948	GO:0031315	extrinsic component of mitochondrial outer membrane	0.004
1949	GO:0005026	transforming growth factor beta receptor activity, type II	0.004
1950	GO:2000378	negative regulation of reactive oxygen species metabolic process	0.004
1951	GO:0050690	regulation of defense response to virus by virus	0.004
1952	GO:0043496	regulation of protein homodimerization activity	0.004
1953	GO:0050687	negative regulation of defense response to virus	0.004
1954	GO:0045664	regulation of neuron differentiation	0.004
1955	GO:0060017	parathyroid gland development	0.004
1956	GO:0048660	regulation of smooth muscle cell proliferation	0.004
1957	GO:0072307	regulation of metanephric nephron tubule epithelial cell differentiation	0.004
1958	GO:2000286	receptor internalization involved in canonical Wnt signaling pathway	0.004
1959	GO:0030538	embryonic genitalia morphogenesis	0.004
1960	GO:2000077	negative regulation of type B pancreatic cell development	0.004
1961	GO:0046521	sphingoid catabolic process	0.003
1962	GO:0070257	positive regulation of mucus secretion	0.003
1963	GO:0035021	negative regulation of Rac protein signal transduction	0.003
1964	GO:0003406	retinal pigment epithelium development	0.003
1965	GO:0048842	positive regulation of axon extension involved in axon guidance	0.003
1966	GO:0001841	neural tube formation	0.003
1967	GO:0016328	lateral plasma membrane	0.003
1968	GO:0045295	gamma-catenin binding	0.003
1969	GO:0035771	interleukin-4-mediated signaling pathway	0.003
1970	GO:2001038	regulation of cellular response to drug	0.003
1971	GO:0018393	internal peptidyl-lysine acetylation	0.003
1972	GO:0070513	death domain binding	0.003
1973	GO:0035330	regulation of hippo signaling	0.003
1974	GO:0033159	negative regulation of protein import into nucleus, translocation	0.003
1975	GO:0001537	N-acetylgalactosamine 4-O-sulfotransferase activity	0.003
1976	GO:0007260	tyrosine phosphorylation of STAT protein	0.003
1977	GO:0060055	angiogenesis involved in wound healing	0.003
1978	GO:0031328	positive regulation of cellular biosynthetic process	0.003
1979	GO:0071901	negative regulation of protein serine/threonine kinase activity	0.003
1980	GO:0050760	negative regulation of thymidylate synthase biosynthetic process	0.003
1981	GO:0042524	negative regulation of tyrosine phosphorylation of Stat5 protein	0.003
1982	GO:2000615	regulation of histone H3-K9 acetylation	0.003
1983	GO:0010767	regulation of transcription from RNA polymerase II promoter in response to UV-induced DNA damage	0.003
1984	GO:0010870	positive regulation of receptor biosynthetic process	0.003
1985	GO:0009913	epidermal cell differentiation	0.003
1986	GO:0007221	positive regulation of transcription of Notch receptor target	0.003
1987	GO:0072144	glomerular mesangial cell development	0.003
1988	GO:0051385	response to mineralocorticoid	0.003
1989	GO:0051171	regulation of nitrogen compound metabolic process	0.003
1990	GO:0042483	negative regulation of odontogenesis	0.003
1991	GO:0005089	Rho guanyl-nucleotide exchange factor activity	0.003
1992	GO:0000788	nuclear nucleosome	0.003
1993	GO:0042094	interleukin-2 biosynthetic process	0.003
1994	GO:0072136	metanephric mesenchymal cell proliferation involved in metanephros development	0.003
1995	GO:0048495	Roundabout binding	0.003
1996	GO:0019064	fusion of virus membrane with host plasma membrane	0.003
1997	GO:0060290	transdifferentiation	0.003
1998	GO:0072104	glomerular capillary formation	0.003
[truncated: 10,752 more rows]
